# Supplementary material for: A Concise Synthetic Method for Constructing 3-Substituted Piperazine-2-Acetic Acid Esters from 1,2-Diamines
Source: MDPI journal article supplement (doi:10.3390/molecules27113419), 2022-05-25

# A Concise Synthetic Method for Constructing 3-Substituted Piperazine-2-Acetic Acid Esters from 1,2-Diamines

Srinivas Chamakuri <sup>1,\*</sup>, Sunny Ann Tang <sup>1</sup>, Kevin A. Tran <sup>1</sup>, Shiva Krishna Reddy Guduru <sup>1</sup>, Peter K. Bolin <sup>1</sup>, Kevin R. MacKenzie <sup>1,2</sup> and Damian W. Young <sup>1,2,3,\*</sup>

<sup>1</sup> Center for Drug Discovery, Department of Pathology and Immunology, Baylor College of Medicine, One Baylor Plaza, Houston, TX 77030, USA; sunny.tang@bcm.edu (S.A.T.); kevin.tran@bcm.edu (K.A.T.); shiva.guduru@bcm.edu (S.K.R.G.); peter.bolin@bcm.edu (P.K.B.); kevin.mackenzie@bcm.edu (K.R.M.)

<sup>2</sup> Department of Pharmacology and Chemical Biology, Baylor College of Medicine, One Baylor Plaza, Houston, TX 77030, USA

<sup>3</sup> Verna and Marrs McLean Department of Biochemistry and Molecular Biology, Baylor College of Medicine, Houston, TX 77030, USA

\* Correspondence: srinivas.chamakuri@bcm.edu (S.C.); damian.young@bcm.edu (D.W.Y.)

## Supporting Information Table of Contents

| Content                                                          | Page    |
|------------------------------------------------------------------|---------|
| Experimental procedures, NMR data and NMR assignments            | S2-S5   |
| <sup>1</sup> H, <sup>13</sup> C NMR spectra of all new compounds | S6-S30  |
| Chiral HPLC data                                                 | S31-S44 |

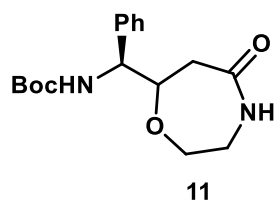

**Tert-butyl ((1S)-(5-oxo-1,4-oxazepan-7-yl)(phenyl)methyl)carbamate (11):** Into a round-bottomed flask equipped with magnetic stir bar and septum,  $\alpha$ ,  $\beta$ -unsaturated olefin (**1 equiv.**) was dissolved in anhydrous DCM. Next, ethanolamine (**4 equiv.**) was added by syringe. The homogeneous solution was stirred at rt for 48h, after which time the TLC and LCMS showed no starting material remaining. The reaction mixture was evaporated to an oil, redissolved in ethyl acetate and washed with water and brine. The organic phase was collected and dried over anhydrous  $\text{Na}_2\text{SO}_4$ . The solvent was removed under reduced pressure to give the crude residue. Purification by silica gel chromatography (ethyl acetate/ hexanes) provided the pure product 11. Yield; 40%. Formula:  $\text{C}_{17}\text{H}_{24}\text{N}_2\text{O}_4$ ;  $^1\text{H}$  NMR (600 MHz,  $\text{CDCl}_3$ )  $\delta$  7.43-7.41 (m, 2H), 7.38 – 7.31 (m, 3H), 7.03 (bs, 1H), 5.84 (bs, 1H), 3.73 – 3.66 (m, 2H), 3.45 (bs, 1H), 3.42 – 3.34 (m, 2H), 3.19 – 3.17 (m, 2H), 1.49-1.47 (m, 9H).

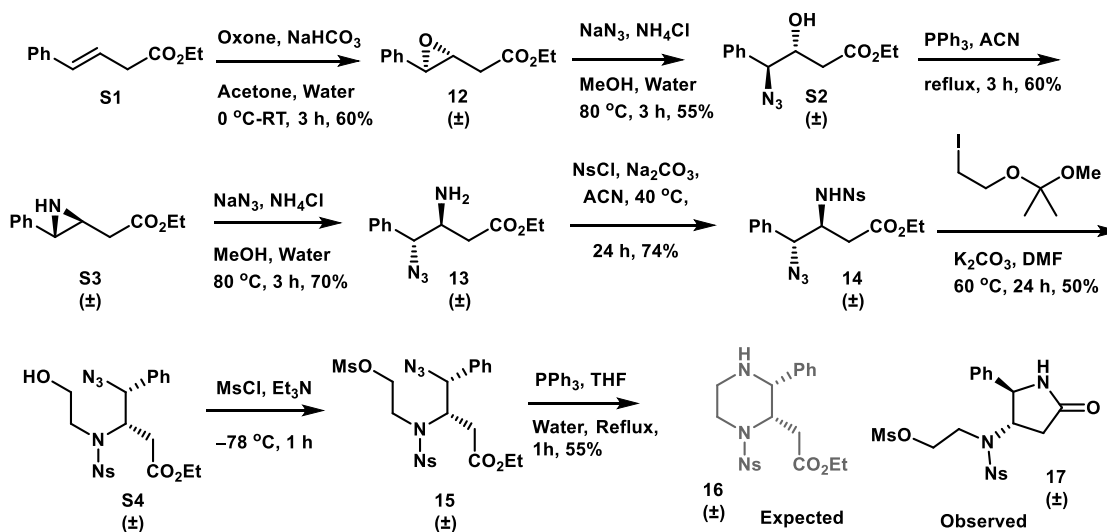

**Scheme S1:** synthesis of 3-Phenyl substituted piperazines-2-acetic acid ester

The following compounds synthesized by following literature procedure [1 & 2].

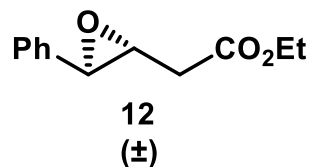

**Ethyl 2-(3-phenyloxiran-2-yl)acetate (12);** Formula: C<sub>12</sub>H<sub>14</sub>O<sub>3</sub>; <sup>1</sup>H NMR (600 MHz, CDCl<sub>3</sub>) δ 7.39 – 7.30 (m, 5H), 4.22 (qd, *J* = 7.1, 1.9 Hz, 2H), 3.74 (d, *J* = 2.1 Hz, 1H), 3.37 (ddd, *J* = 6.2, 5.2, 2.1 Hz, 1H), 2.79 – 2.69 (m, 2H), 1.31 (t, *J* = 7.2 Hz, 3H).

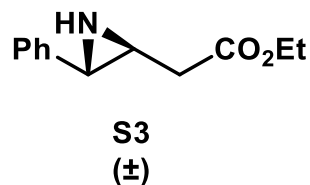

**Ethyl 2-(3-phenylaziridin-2-yl)acetate;** Formula: C<sub>12</sub>H<sub>15</sub>NO<sub>2</sub>; <sup>1</sup>H NMR (600 MHz, CDCl<sub>3</sub>) δ 7.35 – 7.32 (m, 2H), 7.28 – 7.25 (m, 1H), 7.24 – 7.22 (m, 2H), 4.20 (qd, *J* = 7.1, 1.4 Hz, 2H), 2.81 – 2.79 (m, 1H), 2.69 – 2.62 (m, 1H), 2.57-2.53 (m, 2H), 1.30 (t, *J* = 7.2 Hz, 3H).

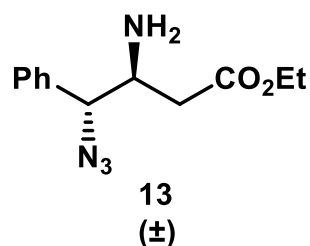

**Ethyl (3S,4R)-3-amino-4-azido-4-phenylbutanoate;** Formula: C<sub>12</sub>H<sub>16</sub>N<sub>4</sub>O<sub>2</sub>; <sup>1</sup>H NMR (600 MHz, CDCl<sub>3</sub>) δ 7.46 – 7.44 (m, 2H), 7.41 – 7.39 (m, 3H), 4.81 – 4.74 (m, 1H), 4.17 (q, *J* = 7.1 Hz, 2H), 3.60 – 3.57 (m, 1H), 2.68 (dd, *J* = 16.5, 3.8 Hz, 1H), 2.55 – 2.51 (m, 1H), 1.28 (t, *J* = 7.1, 3H).

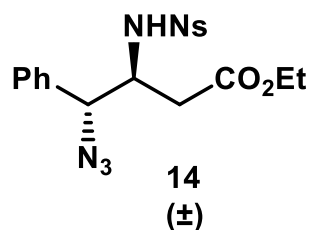

**Ethyl (3S,4R)-4-azido-3-((4-nitrophenyl)sulfonamido)-4-phenylbutanoate;** Formula: C<sub>18</sub>H<sub>19</sub>N<sub>5</sub>O<sub>6</sub>S; <sup>1</sup>H NMR (600 MHz, CDCl<sub>3</sub>) δ 8.01 – 7.99 (m, 1H), 7.86 – 7.84 (m, 1H), 7.71 – 7.67 (m, 2H), 7.28 – 7.24 (m, 5H), 6.12 (d, *J* = 8.5 Hz, 1H), 4.93 (d, *J* = 6.3 Hz, 1H), 4.15-4.10 (m, 1H), 4.05 (q, *J* = 7.1 Hz, 2H), 2.72 (dd, *J* = 16.6, 6.3 Hz, 1H), 2.52 (dd, *J* = 16.6, 4.8 Hz, 1H), 1.23 (t, *J* = 7.1, 3H).

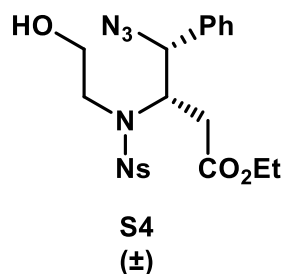

**Ethyl (3S,4R)-4-azido-3-((N-(2-hydroxyethyl)-4-nitrophenyl)sulfonamido)-4-phenylbutanoate;**

Formula: C<sub>20</sub>H<sub>23</sub>N<sub>5</sub>O<sub>7</sub>S; <sup>1</sup>H NMR (600 MHz, CDCl<sub>3</sub>) δ 8.05 (dd, *J* = 7.9, 1.5 Hz, 1H), 7.72 (td, *J* = 7.6, 1.4 Hz, 1H), 7.68 (td, *J* = 7.7, 1.4 Hz, 1H), 7.60 (dd, *J* = 7.8, 1.4 Hz, 1H), 7.35-7.31 (m, 5H), 5.10 (d, *J* = 5.7 Hz, 1H), 4.43-4.40 (m, 1H), 3.96 (q, *J* = 7.1 Hz, 2H), 3.88 (ddd, *J* = 11.5, 6.9, 4.3 Hz, 1H), 3.83 – 3.79 (m, 1H), 3.72 (ddd, *J* = 15.7, 6.9, 4.3 Hz, 1H), 3.43-3.40 (m, 1H), 2.90 (dd, *J* = 16.4, 8.3 Hz, 1H), 2.75 (dd, *J* = 16.4, 5.0 Hz, 1H), 1.19 (t, *J* = 7.2 Hz, 3H).

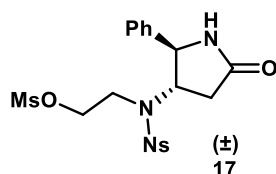

Note: Crude NMR;

**2-((4-nitro-N-((2R,3S)-5-oxo-2-phenylpyrrolidin-3-yl)phenyl)sulfonamido)ethyl**

**methanesulfonate;** Formula: C<sub>19</sub>H<sub>21</sub>N<sub>3</sub>O<sub>8</sub>S<sub>2</sub>; <sup>1</sup>H NMR (600 MHz, CDCl<sub>3</sub>) δ 7.99 (dd, *J* = 7.9, 1.3 Hz, 1H), 7.76 (ddd, *J* = 8.0, 7.4, 1.4 Hz, 1H), 7.68 – 7.64 (m, 1H), 7.38 – 7.32 (m, 3H), 7.31 – 7.26 (m, 4H), 5.58 (d, *J* = 4.3 Hz, 1H), 4.72 (ddd, *J* = 8.8, 5.2, 4.3 Hz, 1H), 4.46 (t, *J* = 5.6 Hz, 2H), 3.81-3.77 (m, 2H), 3.07 (s, 3H), 3.02 – 2.95 (m, 1H), 2.76 – 2.69 (m, 1H).

**23a and 24a are further subjected to Boc-protection on N<sub>1</sub> and compared with literature compounds [1].**

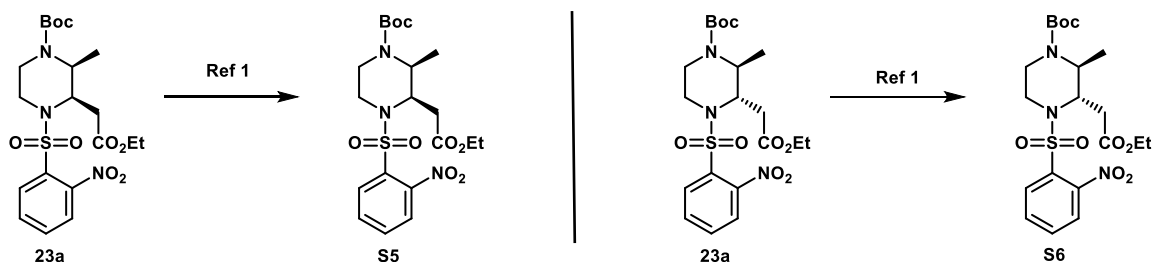

## Analyzing NMR data for the 23b and 24b piperazine products

Assignments for a single set of resonances were unambiguously inferred for **23b** and **24b** in deuterated chloroform from 2D HSQC and HMBC spectra (Table 1).

The expected  $^1\text{H}$ - $^1\text{H}$  J couplings for six membered rings in a canonical chair conformation are:  $^2J$  ~12-15 Hz;  $^3J_{\text{ax-ax}}$  12-13 Hz,  $^3J_{\text{ax-eq}}$  ~3.5-4.0 Hz,  $^3J_{\text{eq-eq}} < 2$  Hz.

**$^3J$  analysis for 23b.** H2 (4.59 ppm) is a multiplet due to the ester  $\text{CH}_2$ , but splitting of H3 (3.95 ppm, 3.2 Hz doublet) matches  $^3J_{\text{ax-eq}}$ . H6 (3.74 ppm, 13.5 Hz doublet, <2Hz multiplet) and H6' (3.16 ppm, 13.5 Hz, 3.0 Hz, doublet of doublets) share the 13.5 Hz  $^2J$  and H6' adds 13.5 Hz  $^3J_{\text{ax-ax}}$ ; the H6' 3.0 Hz coupling matches  $^3J_{\text{ax-eq}}$ , and the small unresolved H6 coupling matches  $^3J_{\text{eq-eq}}$ . H5 (3.06 ppm, 11.6 Hz doublet, unresolved) and H5' (2.89 ppm, 12.0 Hz doublet of doublets, 3.5 Hz further doublet) share the 11.6 Hz  $^2J$  to which H5' adds a large splitting that matches  $^3J_{\text{ax-ax}}$ ; the H5' 3.5 Hz coupling matches  $^3J_{\text{ax-eq}}$ , and the unresolved H5 coupling matches  $^3J_{\text{eq-eq}}$ . The  $^3J$  couplings within the ring indicate that 23b adopts a single chair, and the  $^3J_{\text{ax-eq}}$  between H2 and H3 show that this is the **cis product**. The ester methylene protons have nearly identical chemical shifts, indicating that the C2-E1 bond rotates freely with almost no rotamer bias. The ethyl group protons show no evidence of exchange.

| Table 1. Chemical shift assignments from 600 MHz |              |                 |              |                 |                |
|--------------------------------------------------|--------------|-----------------|--------------|-----------------|----------------|
|                                                  | 23b          |                 | 24b          |                 |                |
|                                                  | $^1\text{H}$ | $^{13}\text{C}$ | $^1\text{H}$ | $^{13}\text{C}$ | $\Delta\delta$ |
| 2                                                | 4.59         | 55.93           | 4.67         | 54.55           | -1.4           |
| 3                                                | 3.95         | 62.94           | 3.96         | 57.14           | -5.8           |
| 5                                                | 3.06         | 46.61           | 2.96         | 39.99           | -6.6           |
| 5'                                               | 2.89         |                 | 2.80         |                 |                |
| 6                                                | 3.74         | 41.05           | 3.51         | 41.58           | +0.5           |
| 6'                                               | 3.16         |                 | 3.25         |                 |                |
| E1                                               | 2.37         | 31.00           | 3.18         | 36.03           | +5.0           |
| E1'                                              |              |                 | 2.54         |                 |                |
| E2                                               |              | 170.52          |              | 170.94          | +0.4           |
| Et1                                              | 3.62         | 60.49           | 4.07*        | 61.11           | +0.6           |
| Et2                                              | 0.96         | 13.95           | 1.19         | 14.20           | +0.2           |

**$^3J$  analysis for 24b.** H2 (4.67 ppm, 9.4 Hz, ~3Hz, doublet of doublets) shows a 9.4 Hz coupling to E1; with a pair of doublets of ~3 Hz,  $^3J_{\text{H2-H3}}$  is a poor match to  $^3J_{\text{eq-eq}}$  but it could be  $^3J_{\text{ax-eq}}$  or result from averaging of  $^3J_{\text{eq-eq}}$  with a little  $^3J_{\text{ax-ax}}$ . The broad H3 peak (3.95 ppm, 6 Hz FWHM, unresolved) could mask any doublet of about 3 Hz or smaller, and so is of little help. E1 (3.18 ppm, 16.3 Hz, 9.4 Hz, doublet of doublets) and E1' (2.54 ppm, 16.3 Hz, 3.4 Hz, doublet of doublets) share a 16.3 Hz  $^2J$ ; the E1 9.4 Hz doublet is due to H2, as is the E1' 3.4 Hz doublet. The different values for  $^3J_{\text{H2-E1}}$  and  $^3J_{\text{H2-E1'}}$  mean that any averaging about the C2-E1 bond must be highly rotamer biased, consistent with the E1/E1' chemical shift differences. H5 (2.96 ppm, 11.9 Hz, 3.9 Hz, doublet of doublets) and H5' (2.80 ppm, 12.2 Hz, 3.0 Hz, doublet of doublets) share the 12.2 Hz  $^2J$  and H5 adds one coupling that is somewhat weaker than  $^3J_{\text{ax-ax}}$  and another that is at the upper limit of or stronger than  $^3J_{\text{ax-eq}}$ . The two H5' ~3.0 Hz couplings are too strong and too similar to correspond to both  $^3J_{\text{eq-eq}}$  and  $^3J_{\text{ax-eq}}$ . H6 (3.51 ppm, 12.9 Hz, 3.0 Hz, doublet of doublets) and H6' (3.25 ppm, 12.1, 3.5 Hz, doublet of doublets) share the 12.9 Hz  $^2J$  and H6' adds a strong coupling that seems weaker than  $^3J_{\text{ax-ax}}$ ; the H6' 3.5 Hz coupling could however be  $^3J_{\text{ax-eq}}$ . The lack of a small  $^3J_{\text{eq-eq}}$  (< 2 Hz) between the H5s/H6s or between H2 and H3 indicates that 24b does not adopt a single chair; we infer that it averages between the diaxial (predominant) and diequatorial species. The multiplet pattern for the ethyl  $\text{CH}_2$  is consistent with some kind of exchange.

## References:

1. Reddy Guduru, S.K.; ChamaKuri, S.; Raji, I.O.; MacKenzie, K.R.; Santini, C.; Young, D.W. Synthesis of Enantiomerically Pure 3-Substituted Piperazine-2-acetic Acid Esters as Intermediates for Library Production. *J. Org. Chem.* **2018**, *83*, 11777–11793.
2. Bisol, T.B.; Bortoluzzi, A.J.; Sa, M.M. Nucleophilic ring-opening of epoxide and aziridine acetates for the stereodivergent synthesis of  $\beta$ -hydroxy and  $\beta$ -amino  $\gamma$ -lactams. *J. Org. Chem.* **2011**, *76*, 948–962.

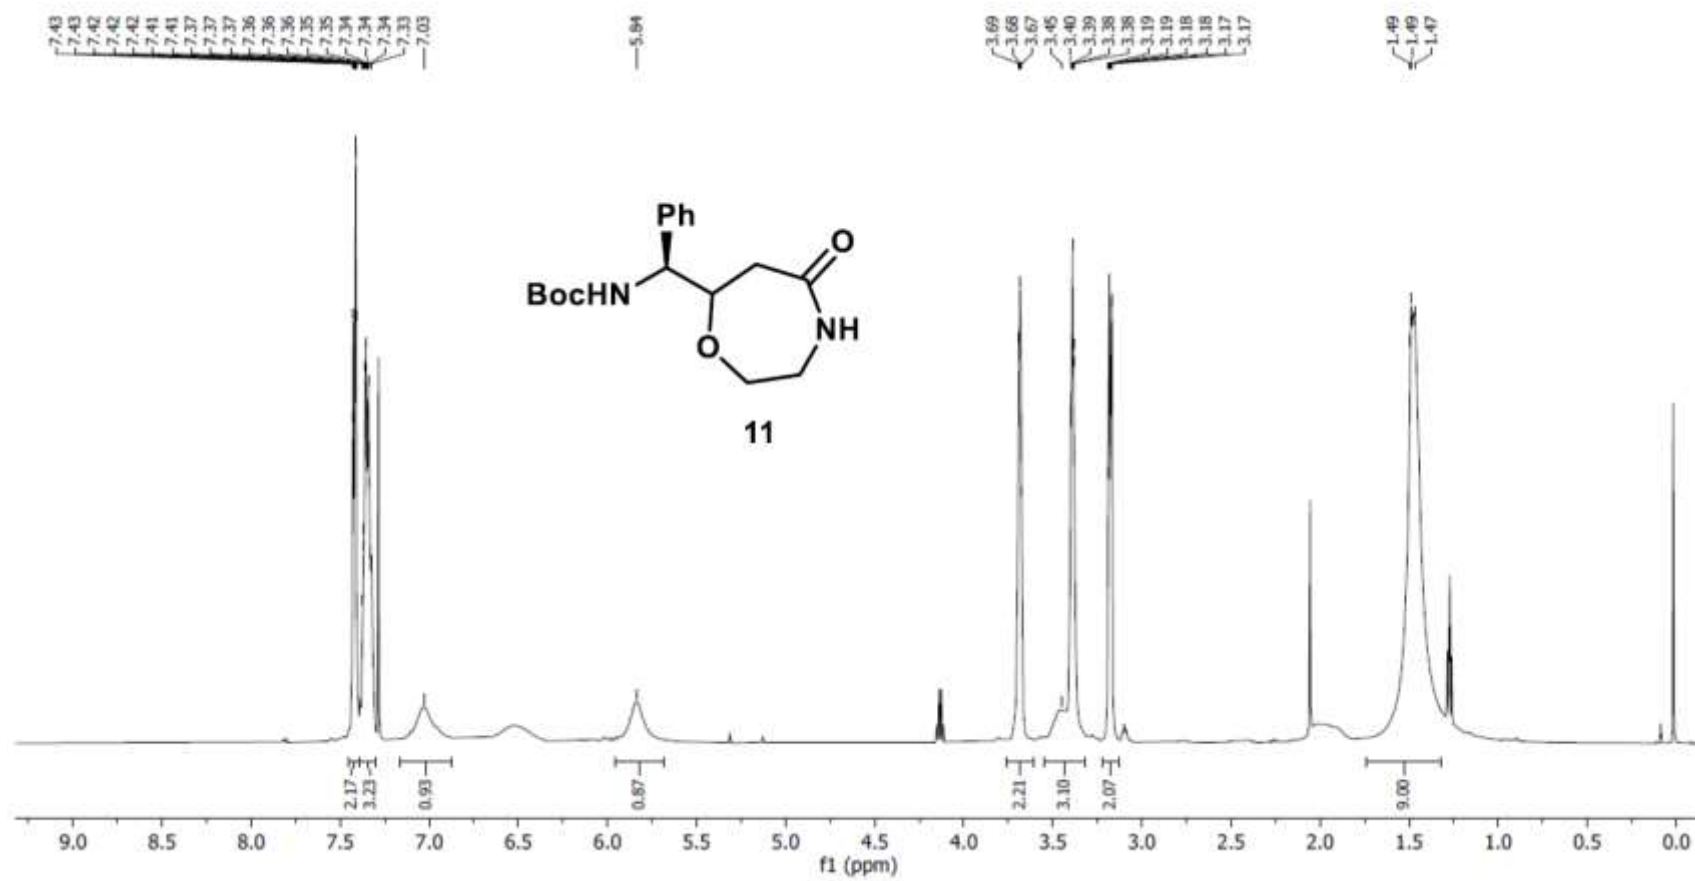



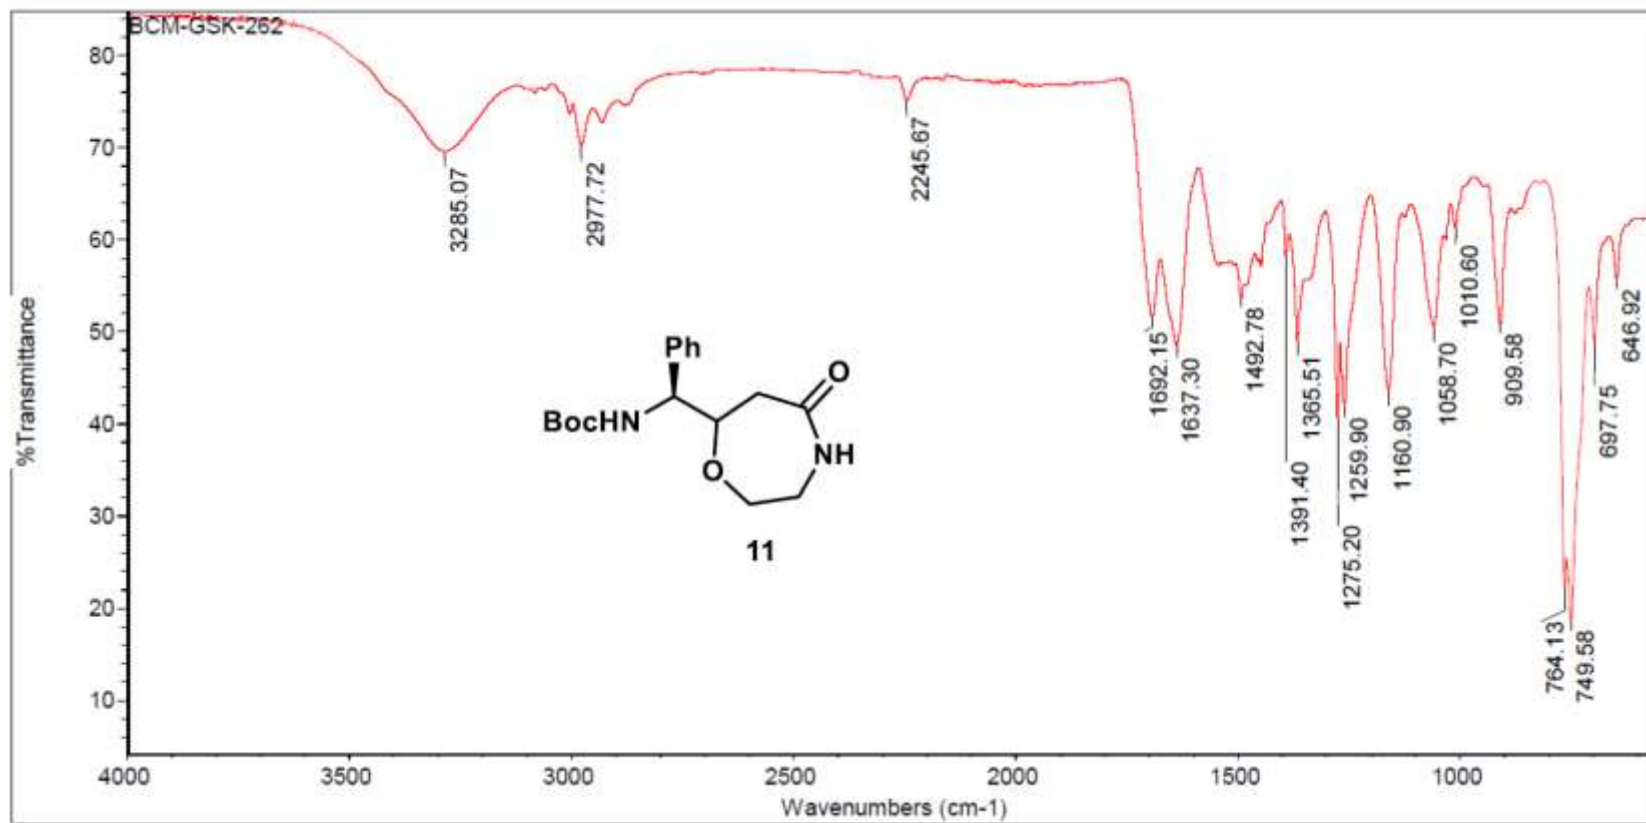

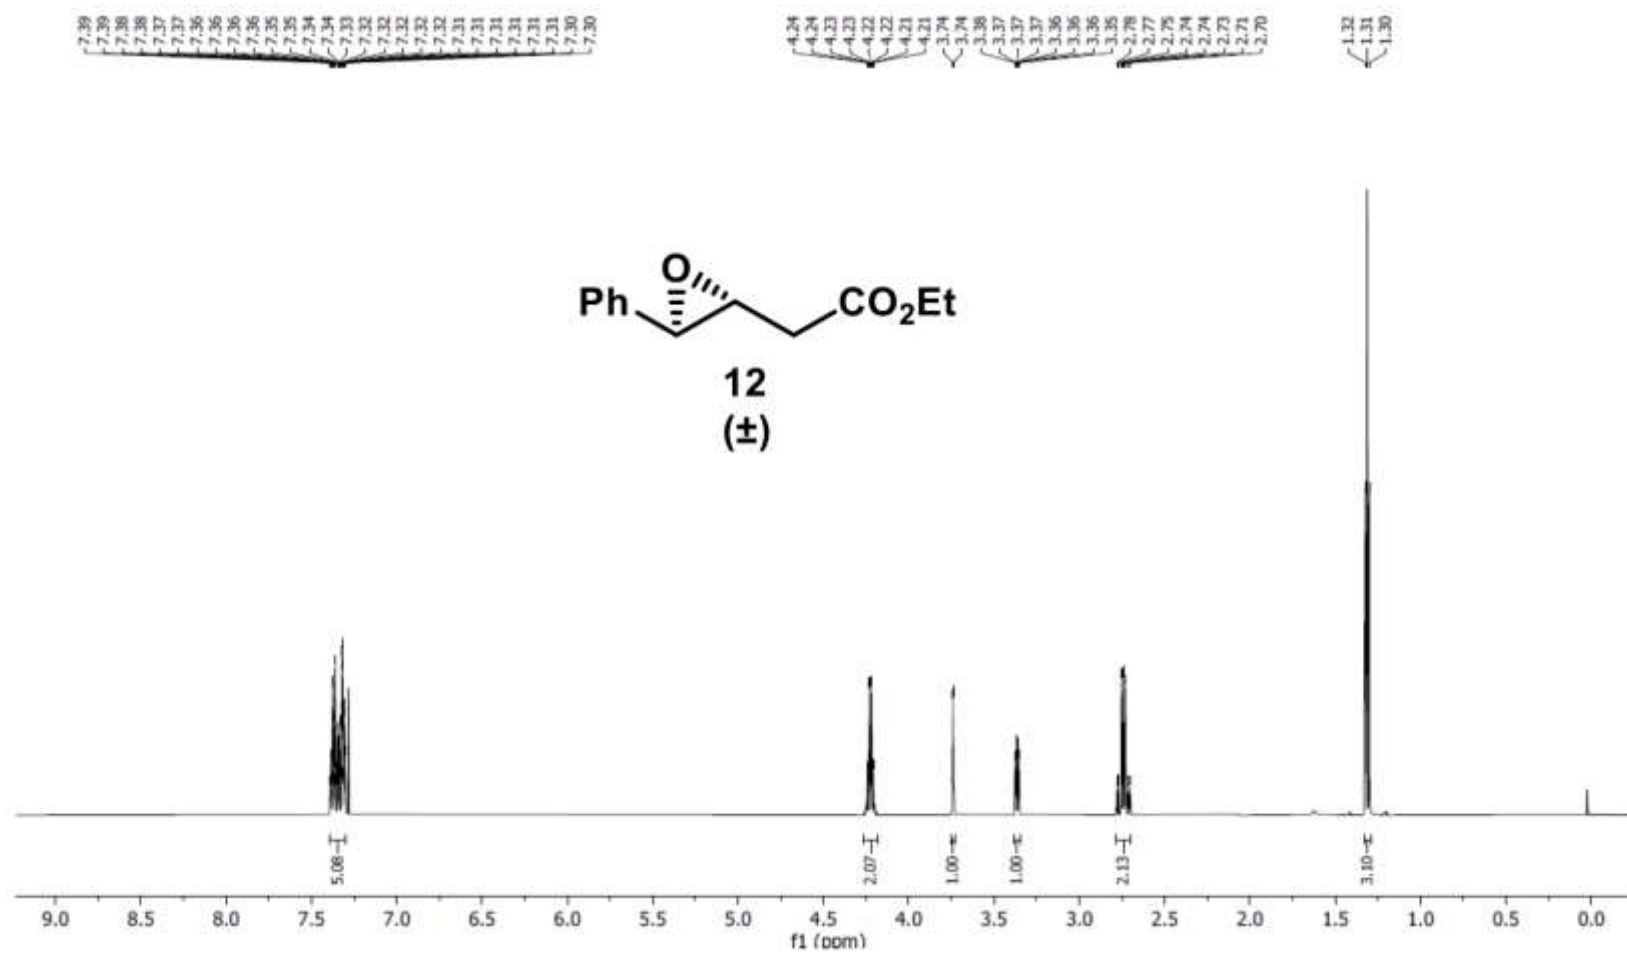

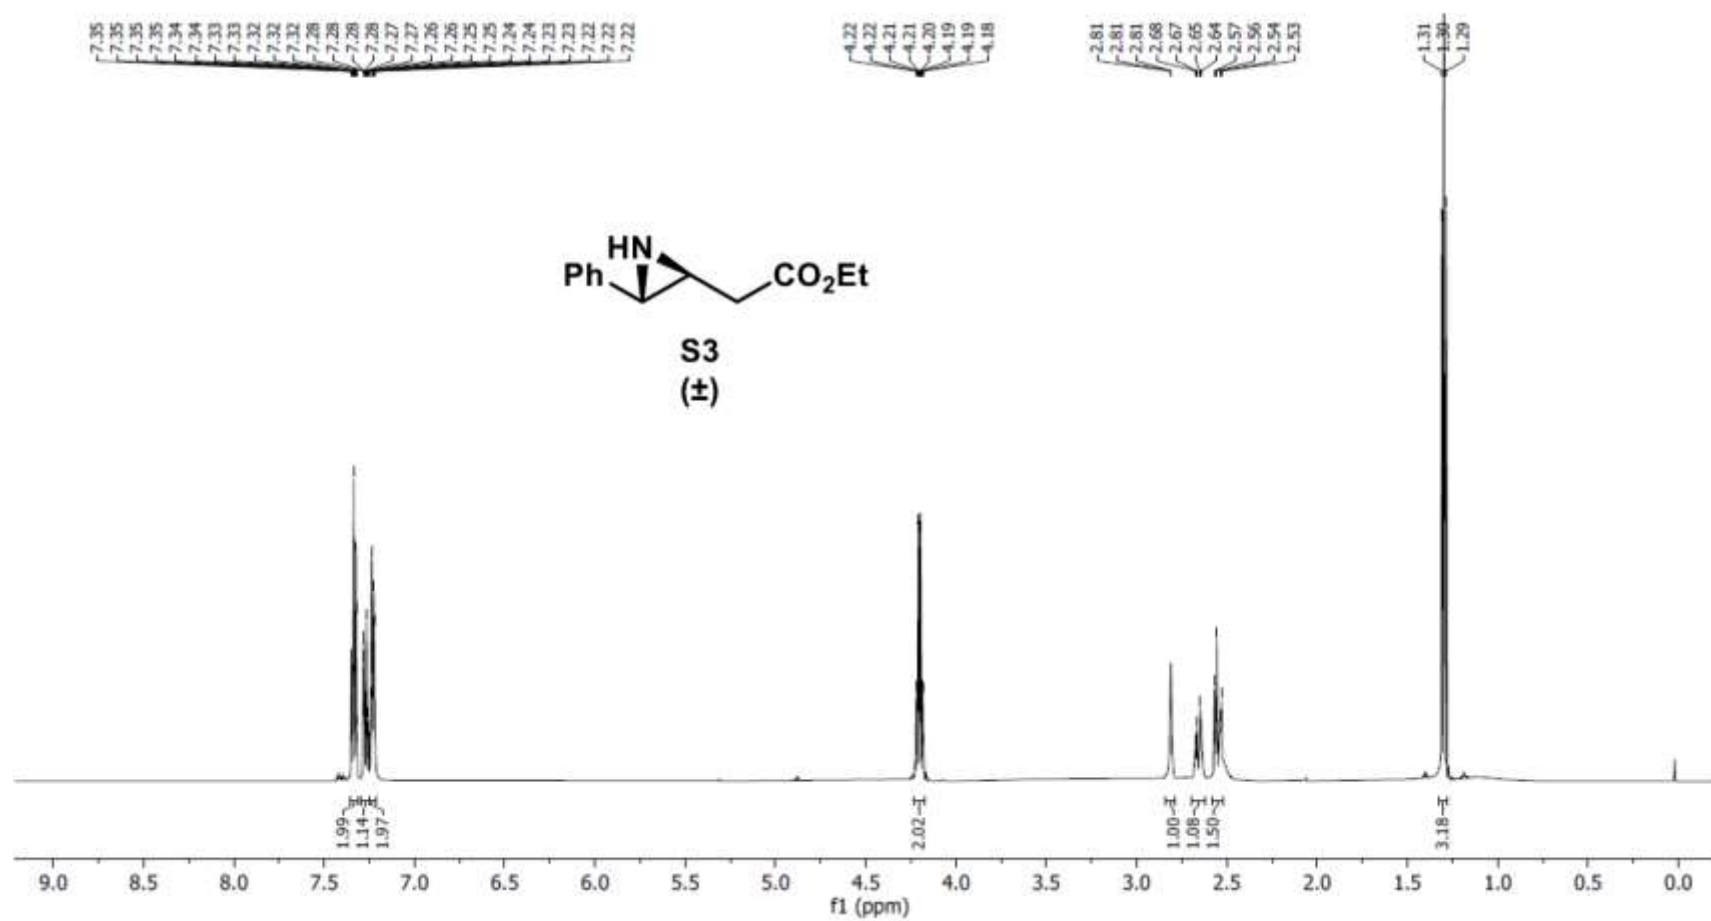

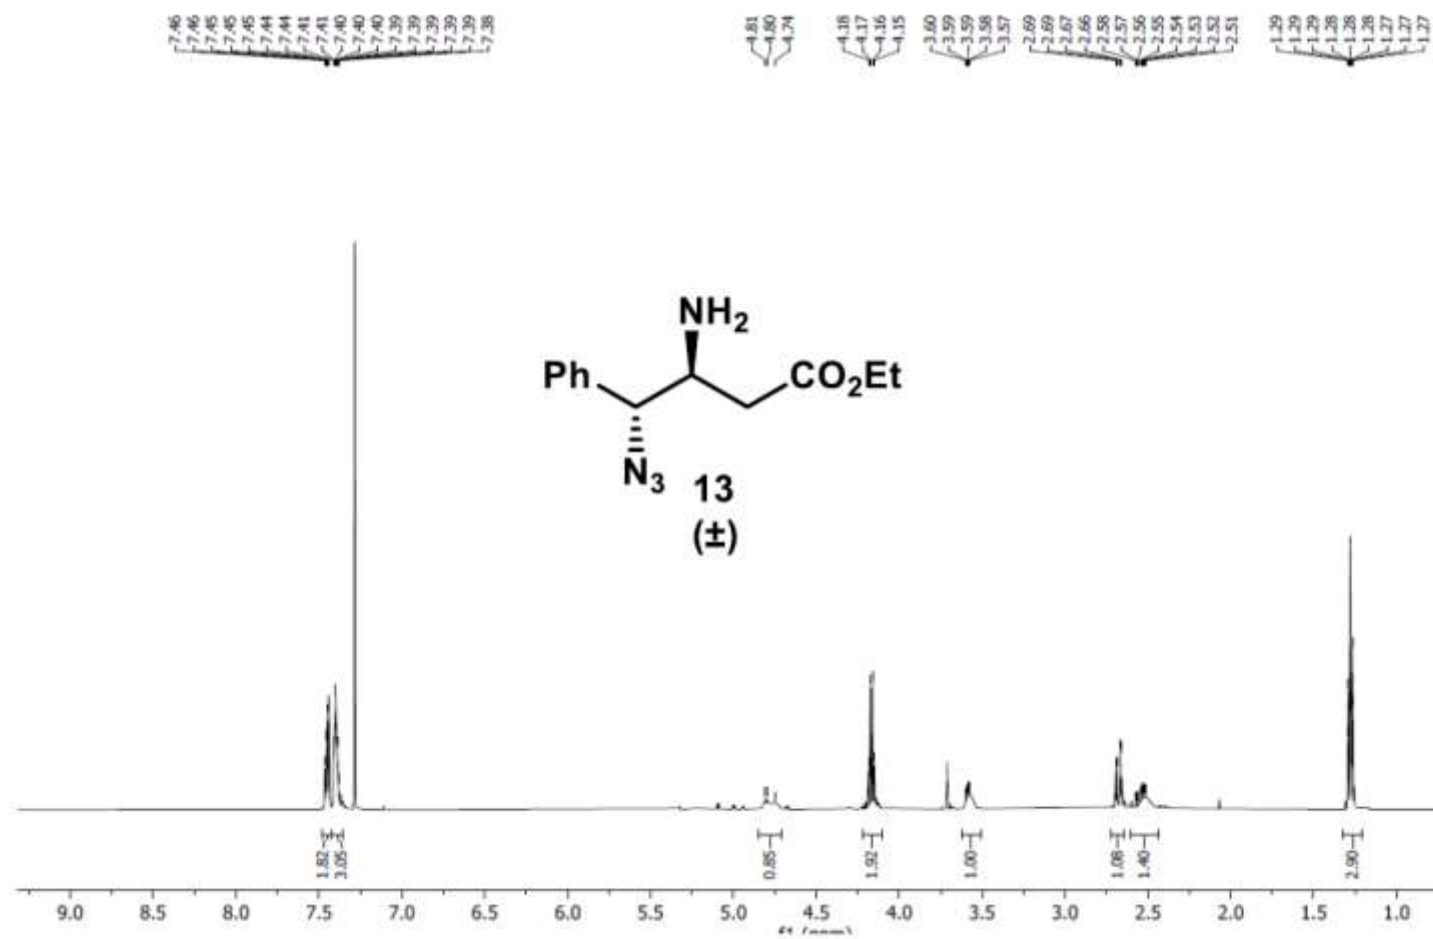

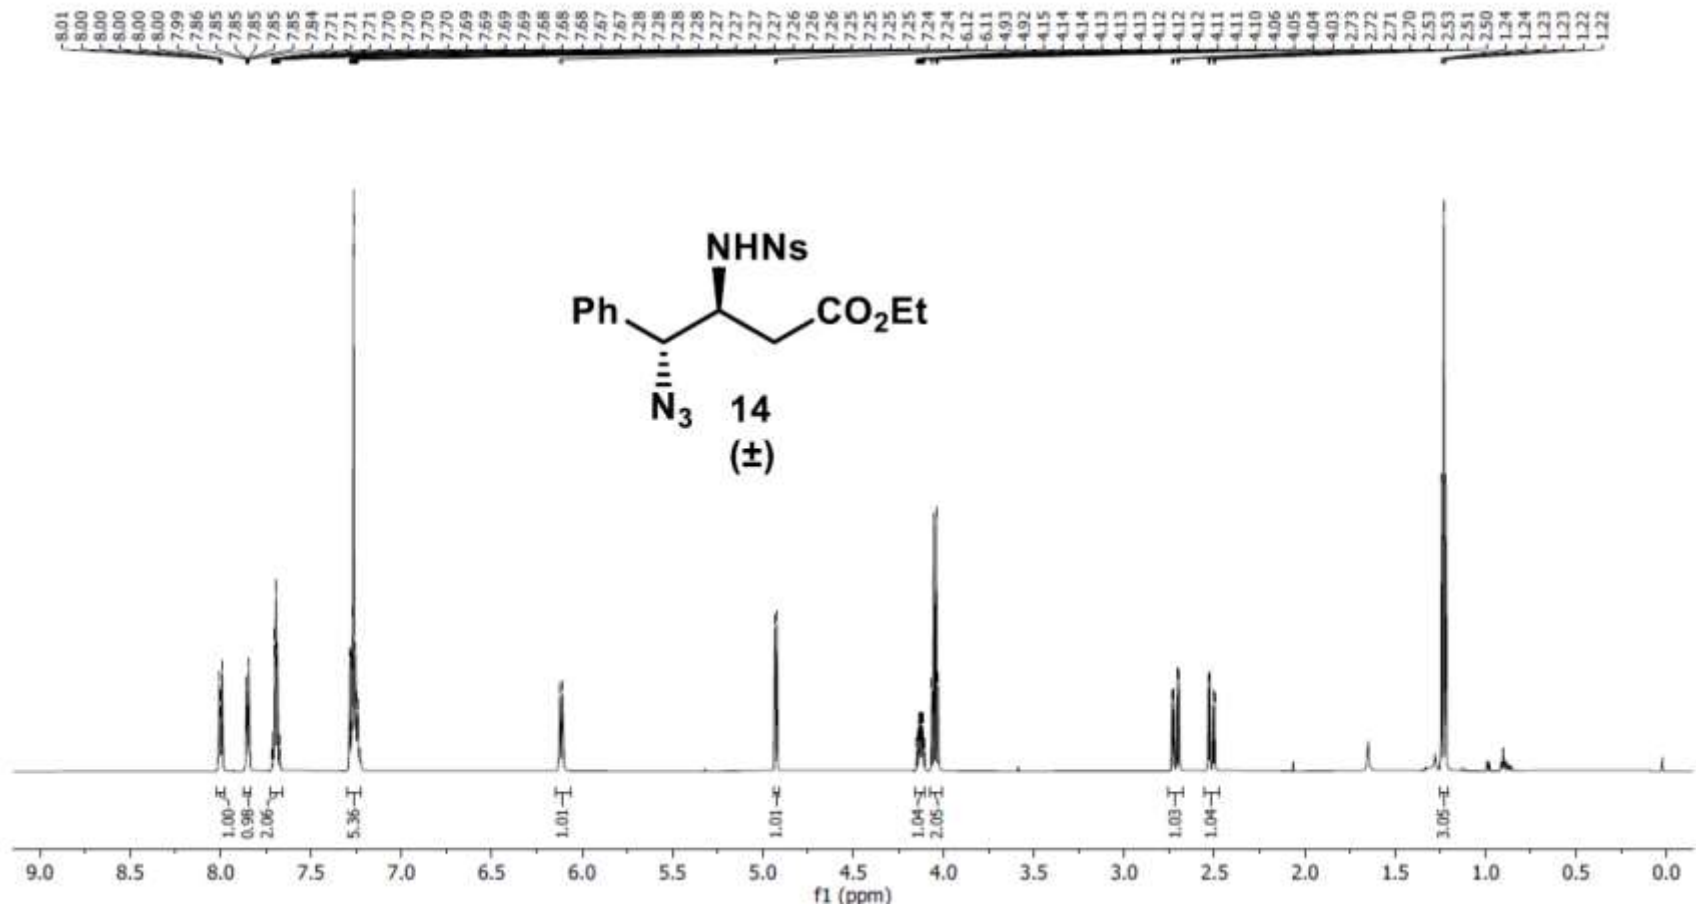

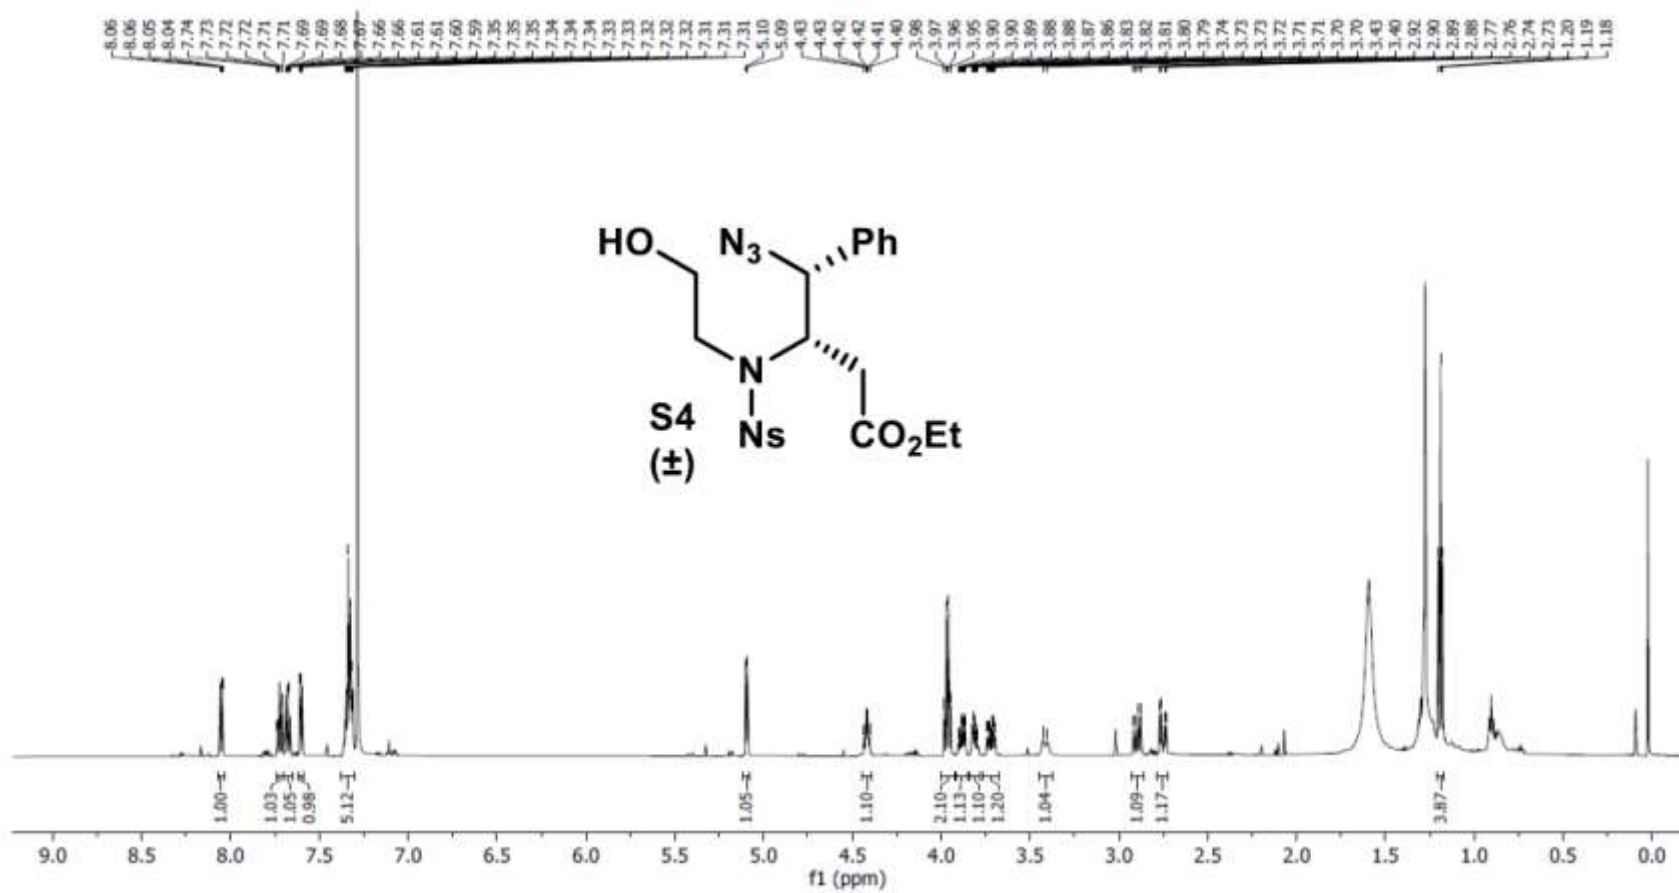

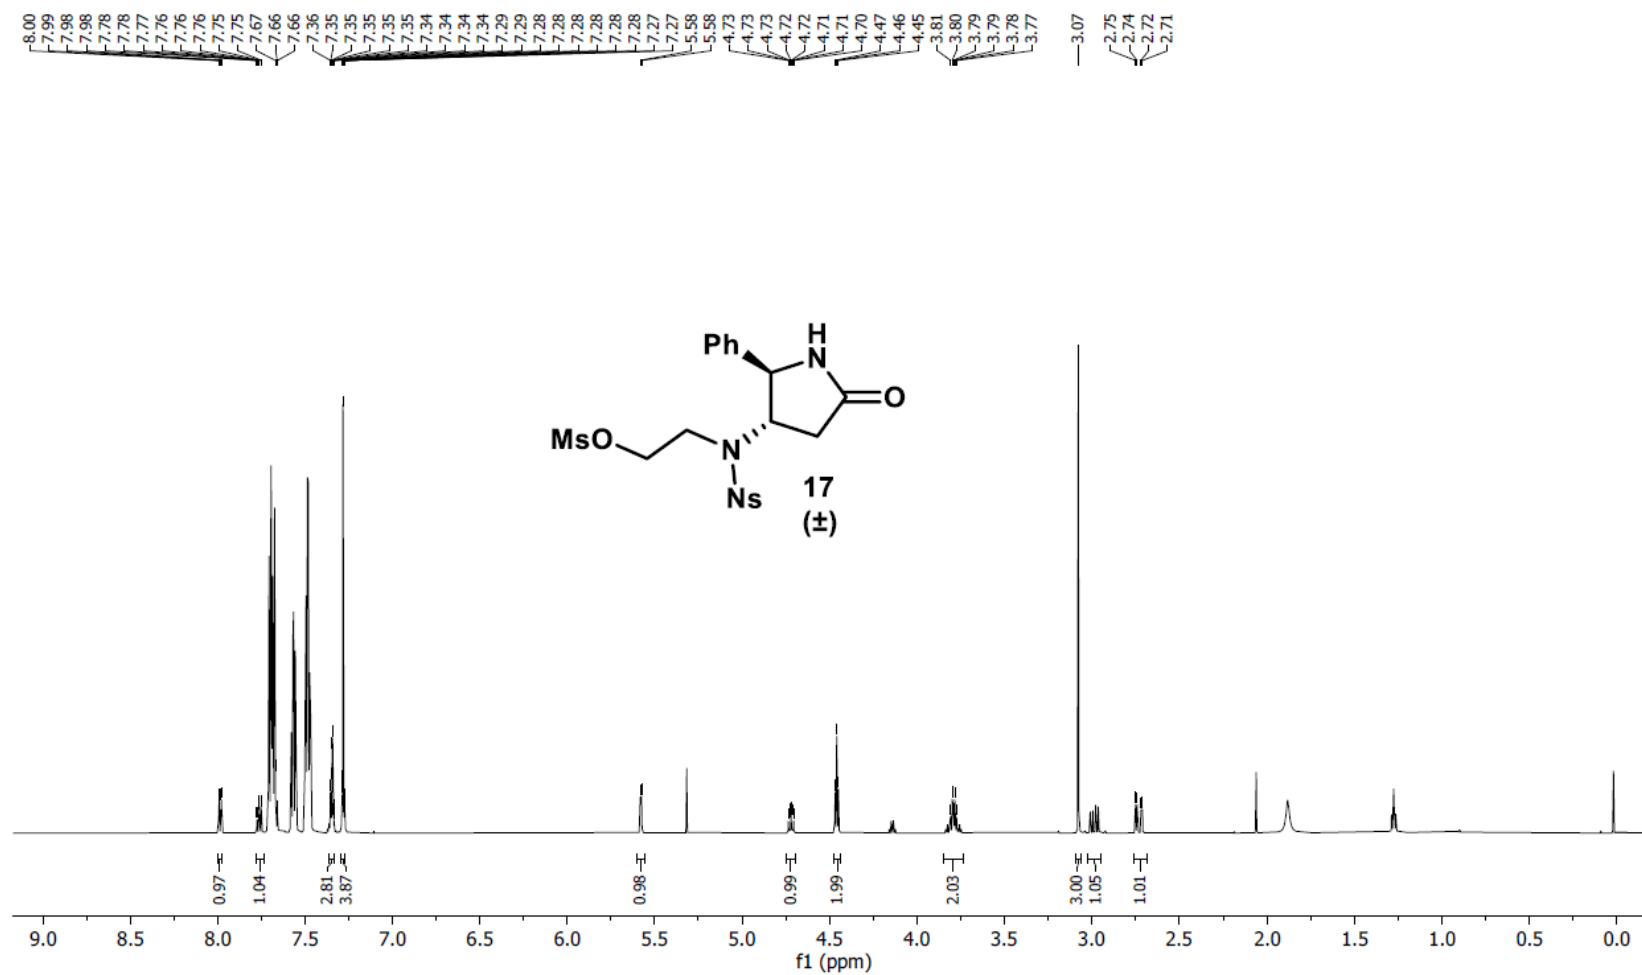

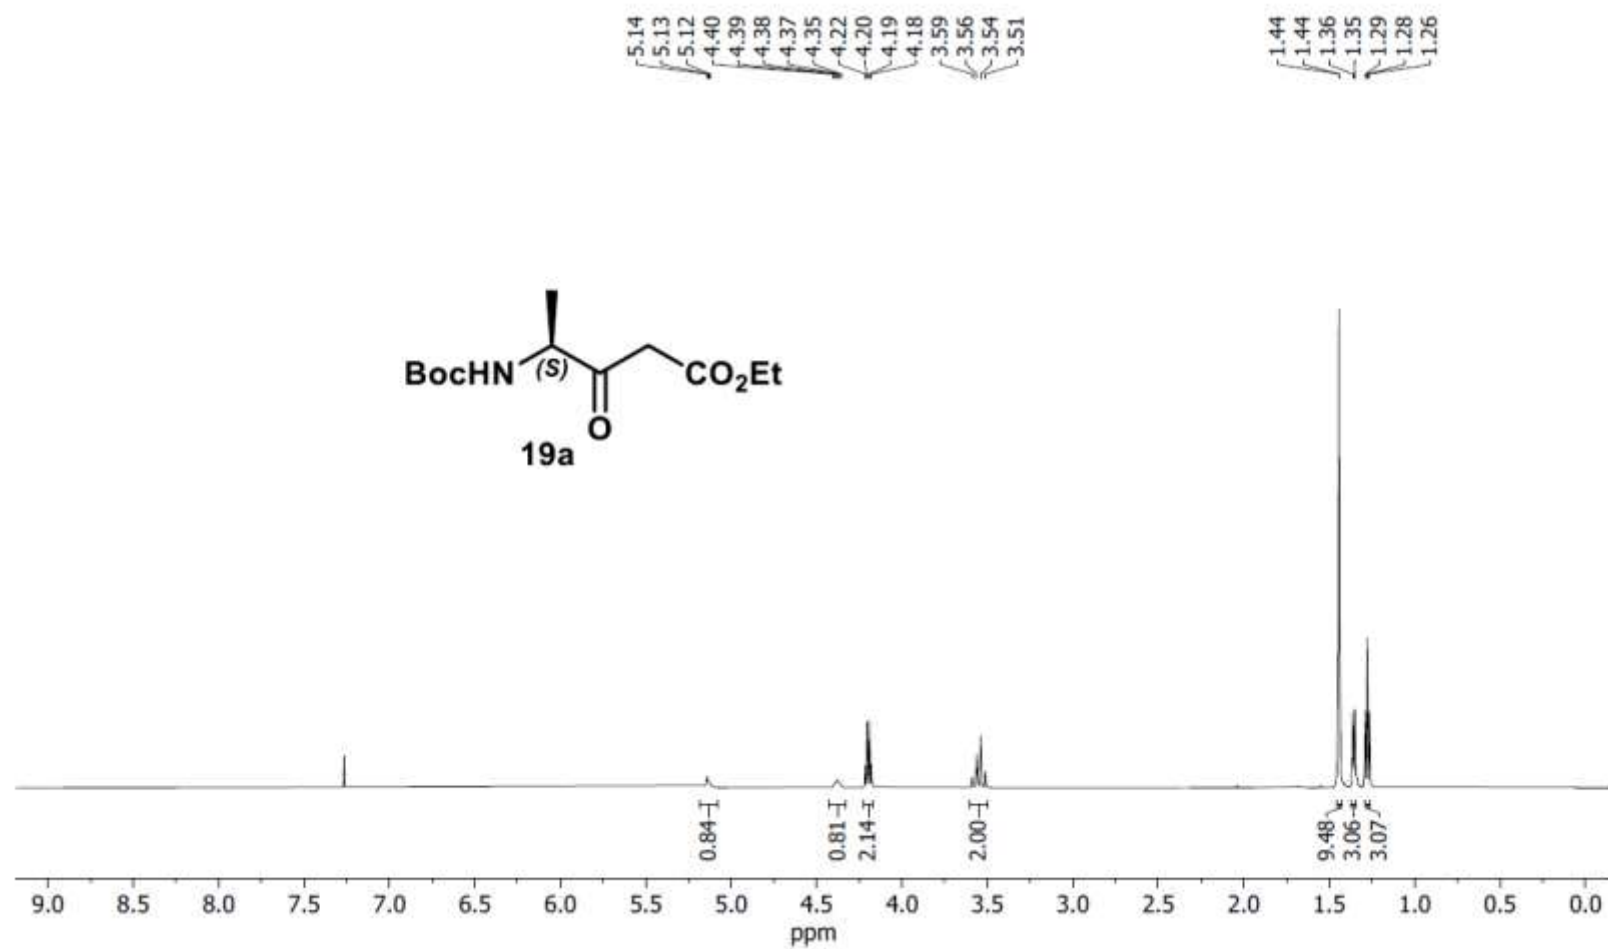

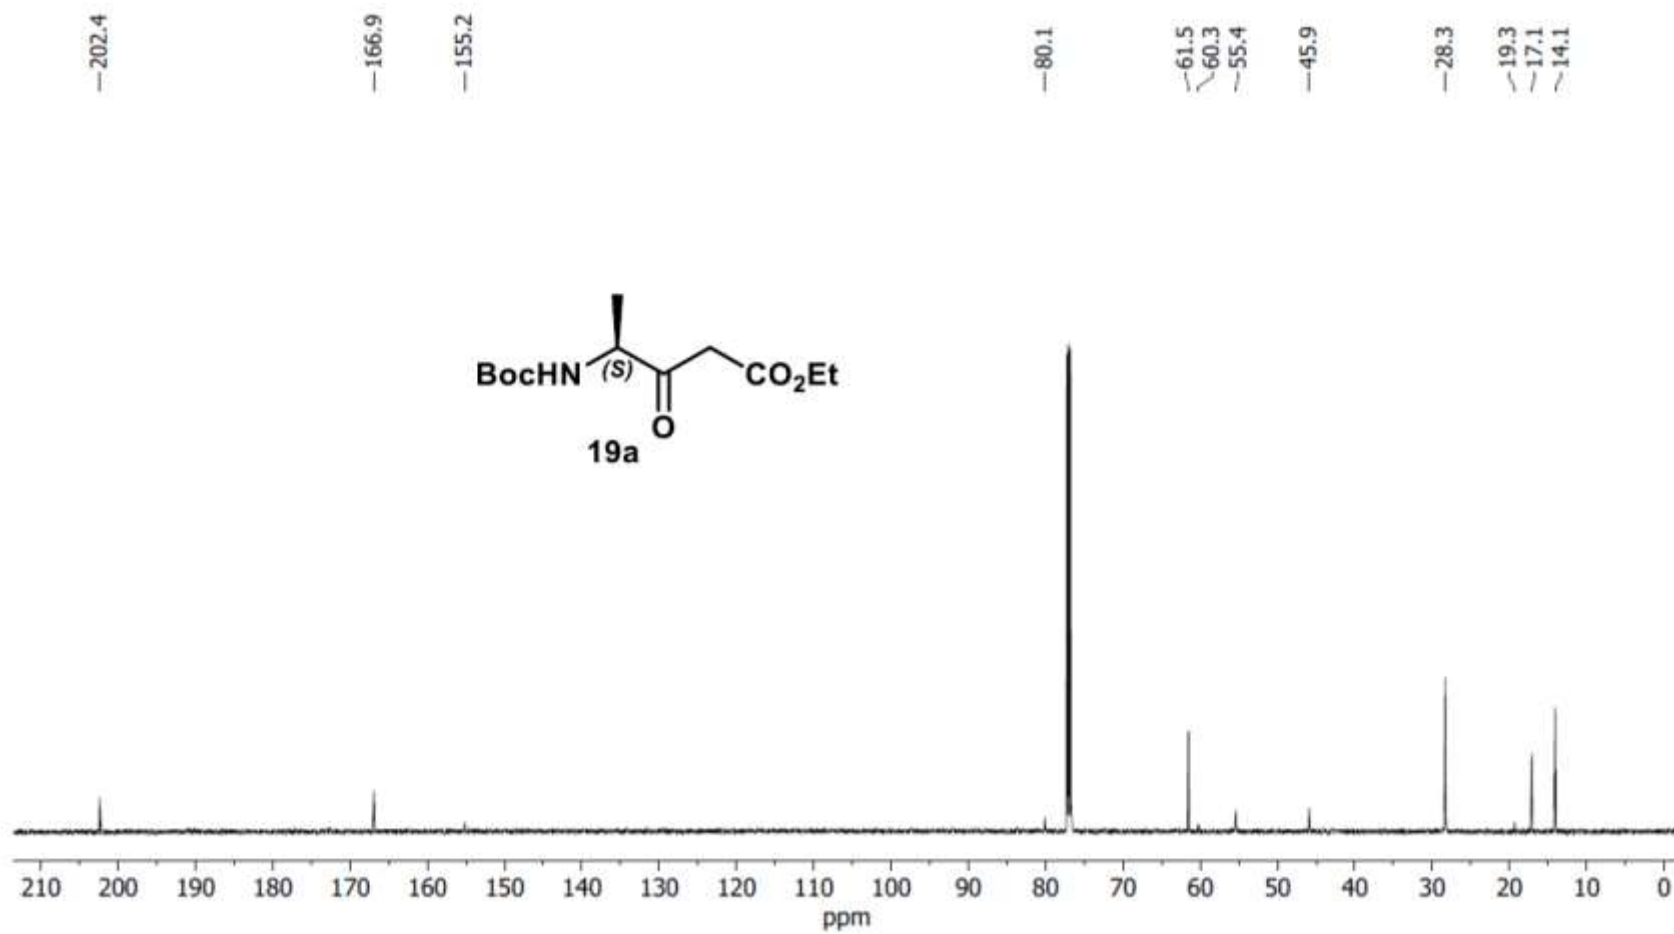

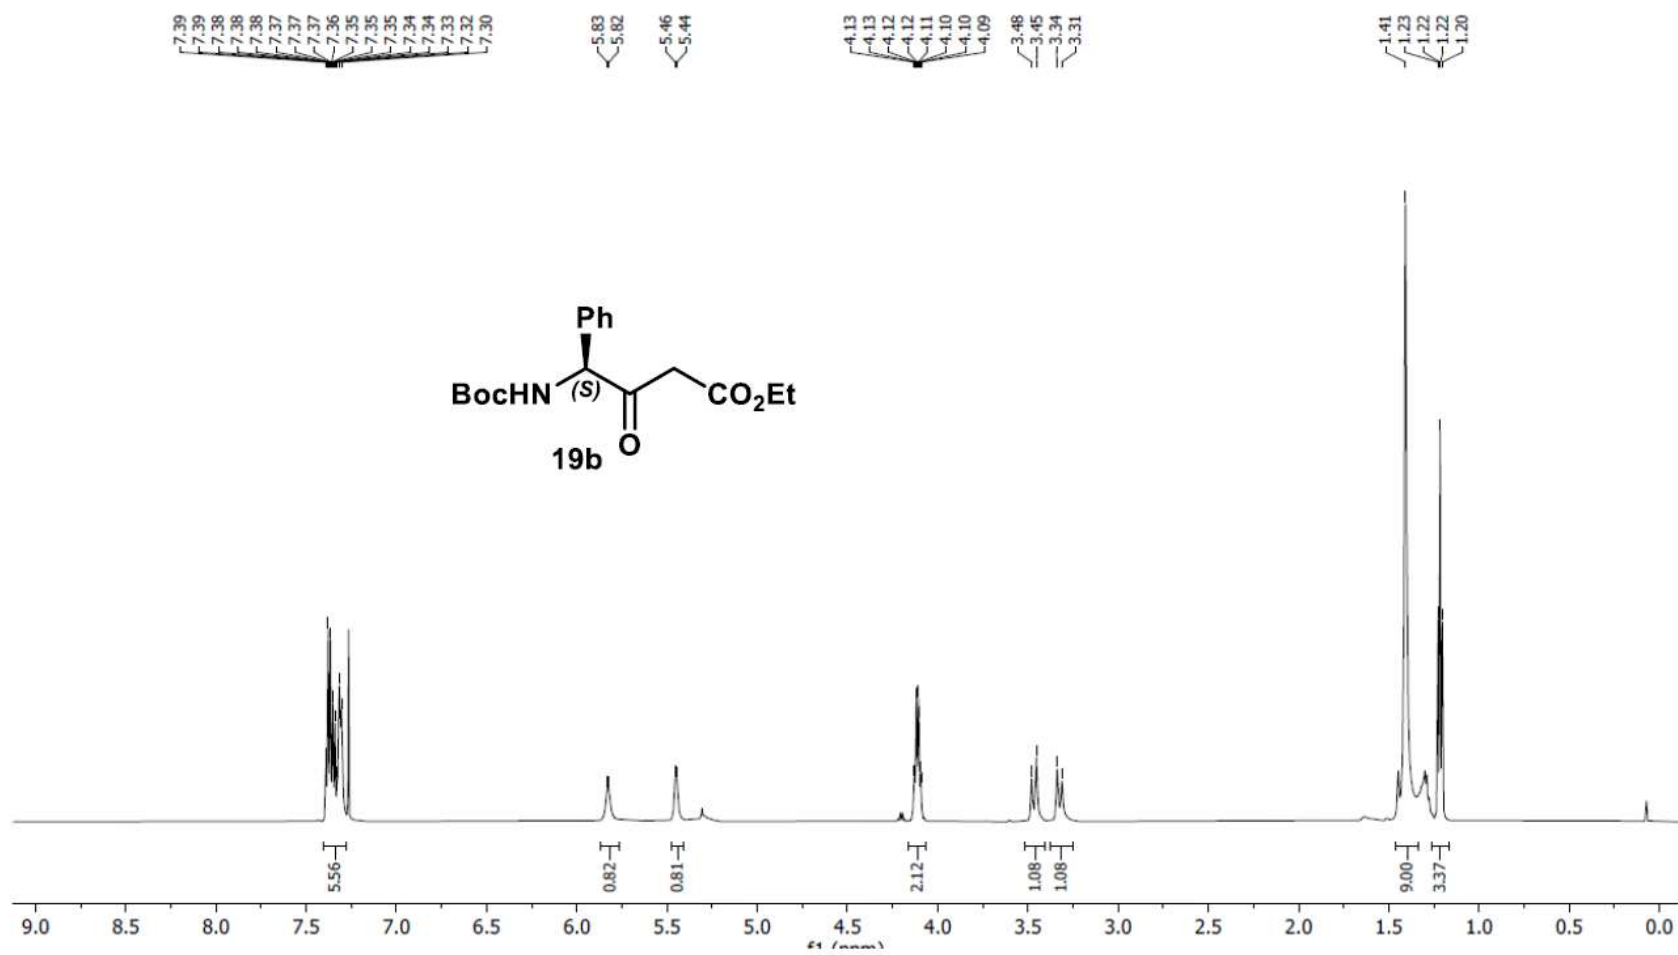

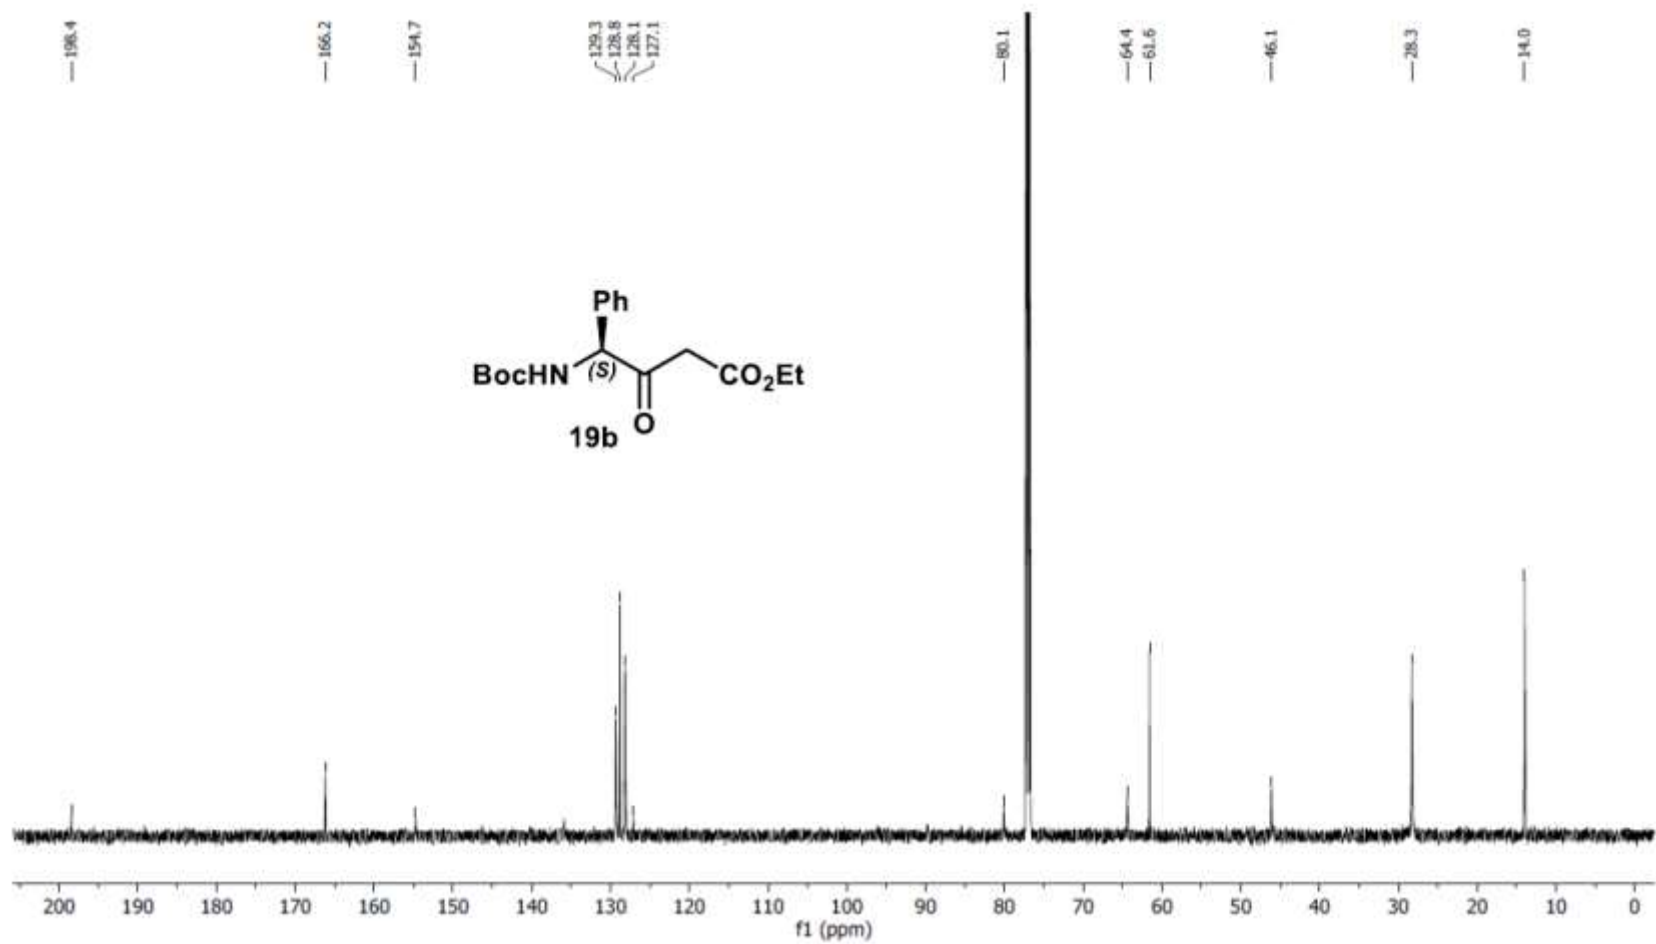

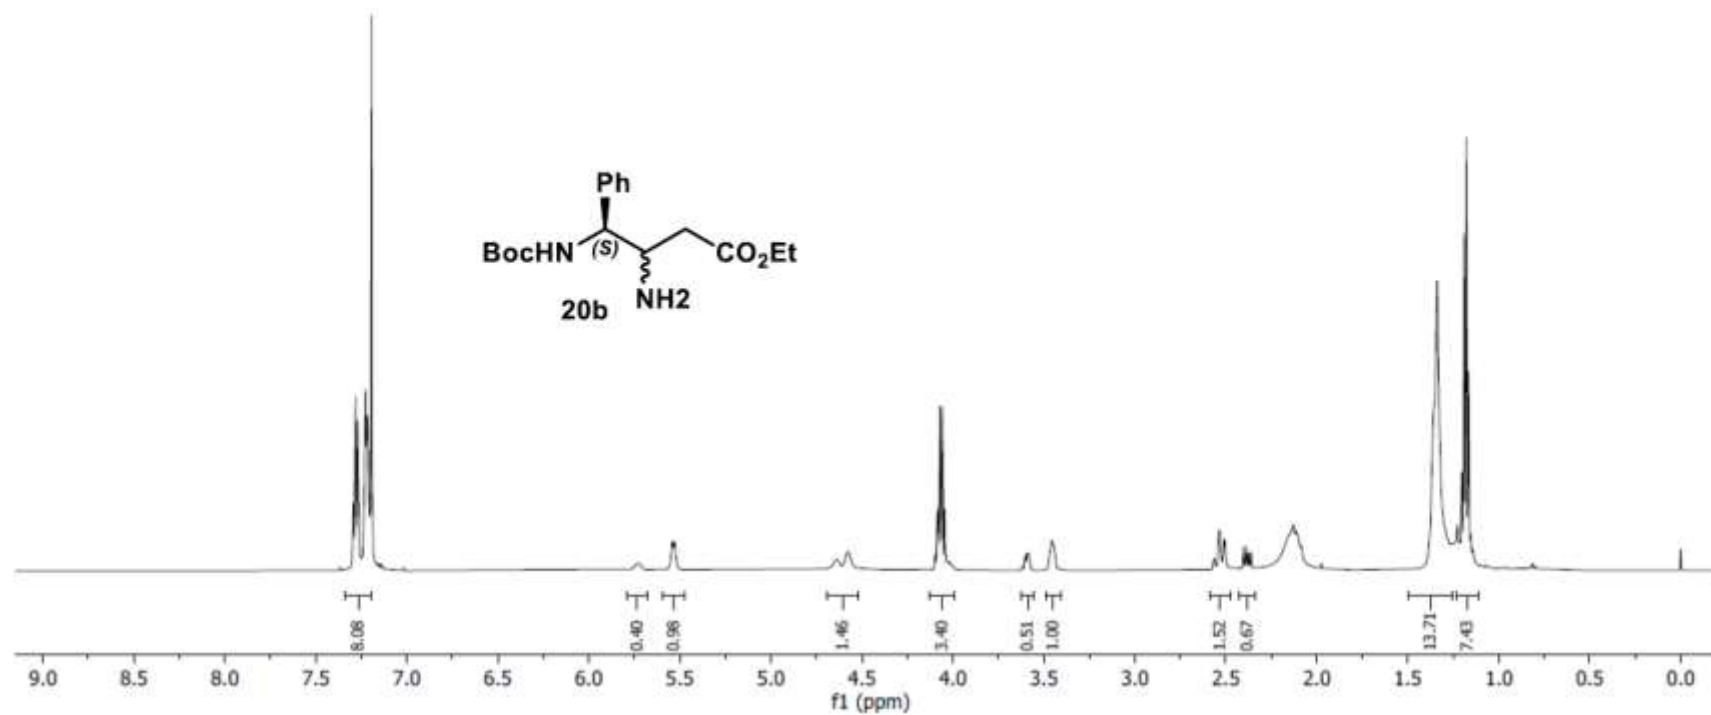



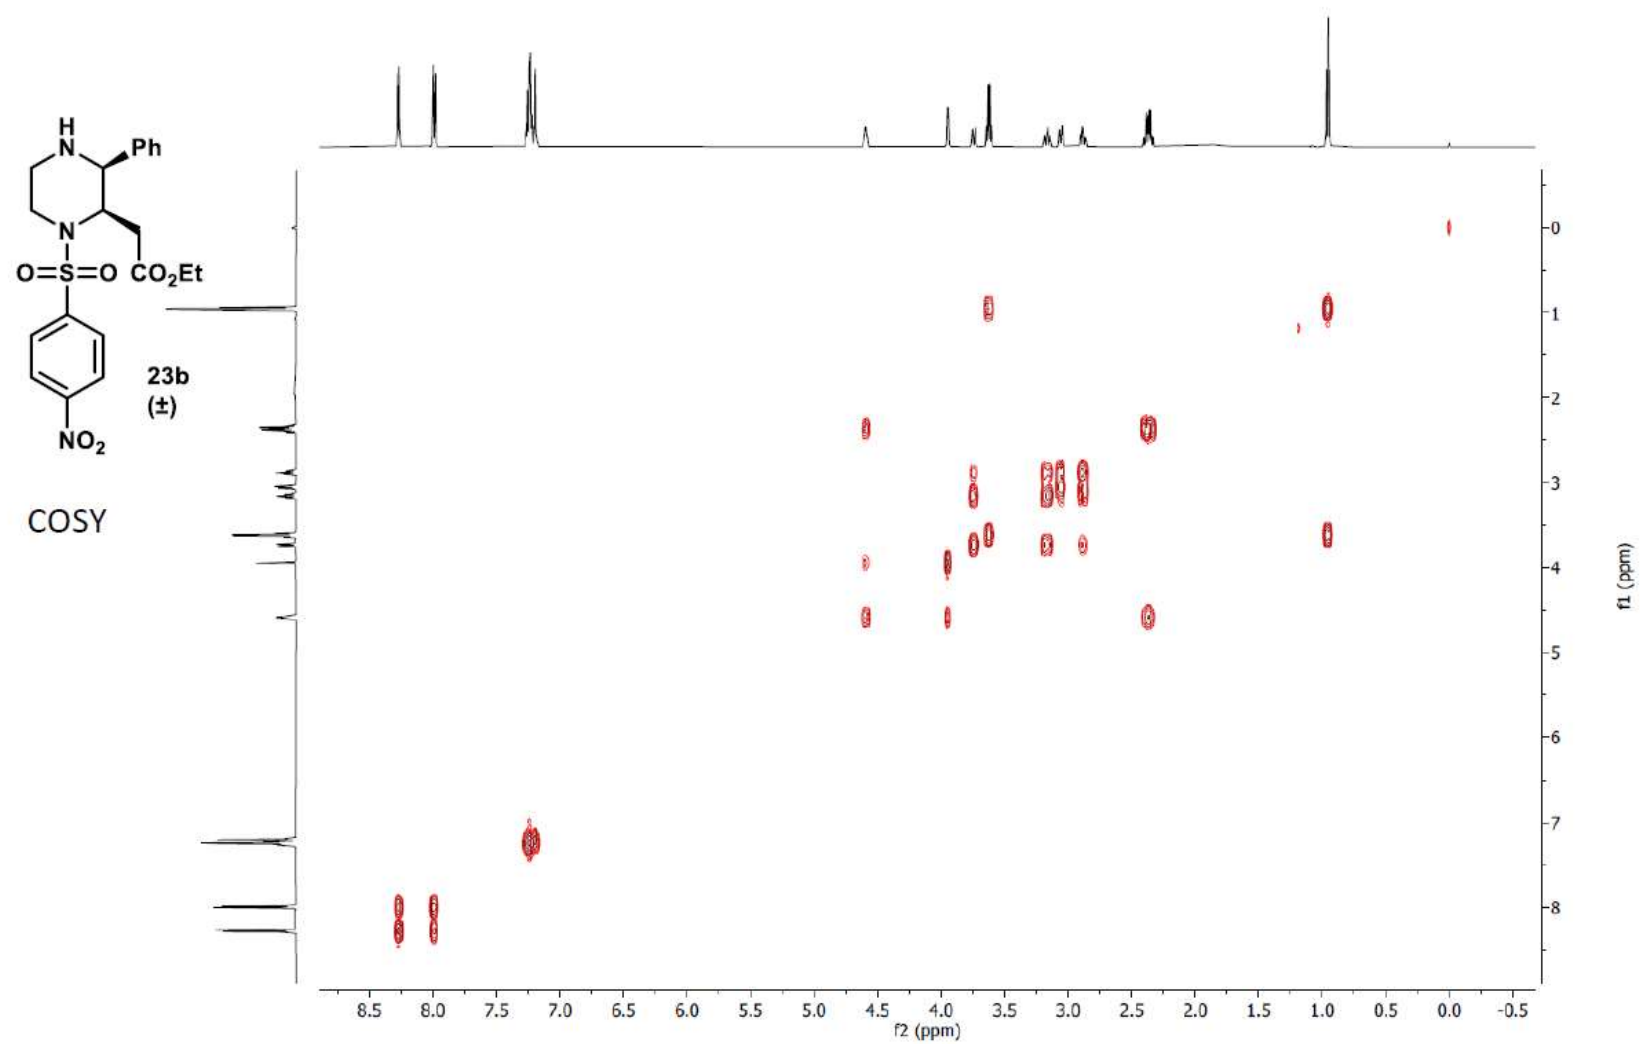

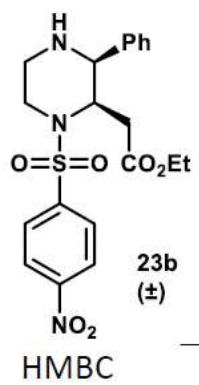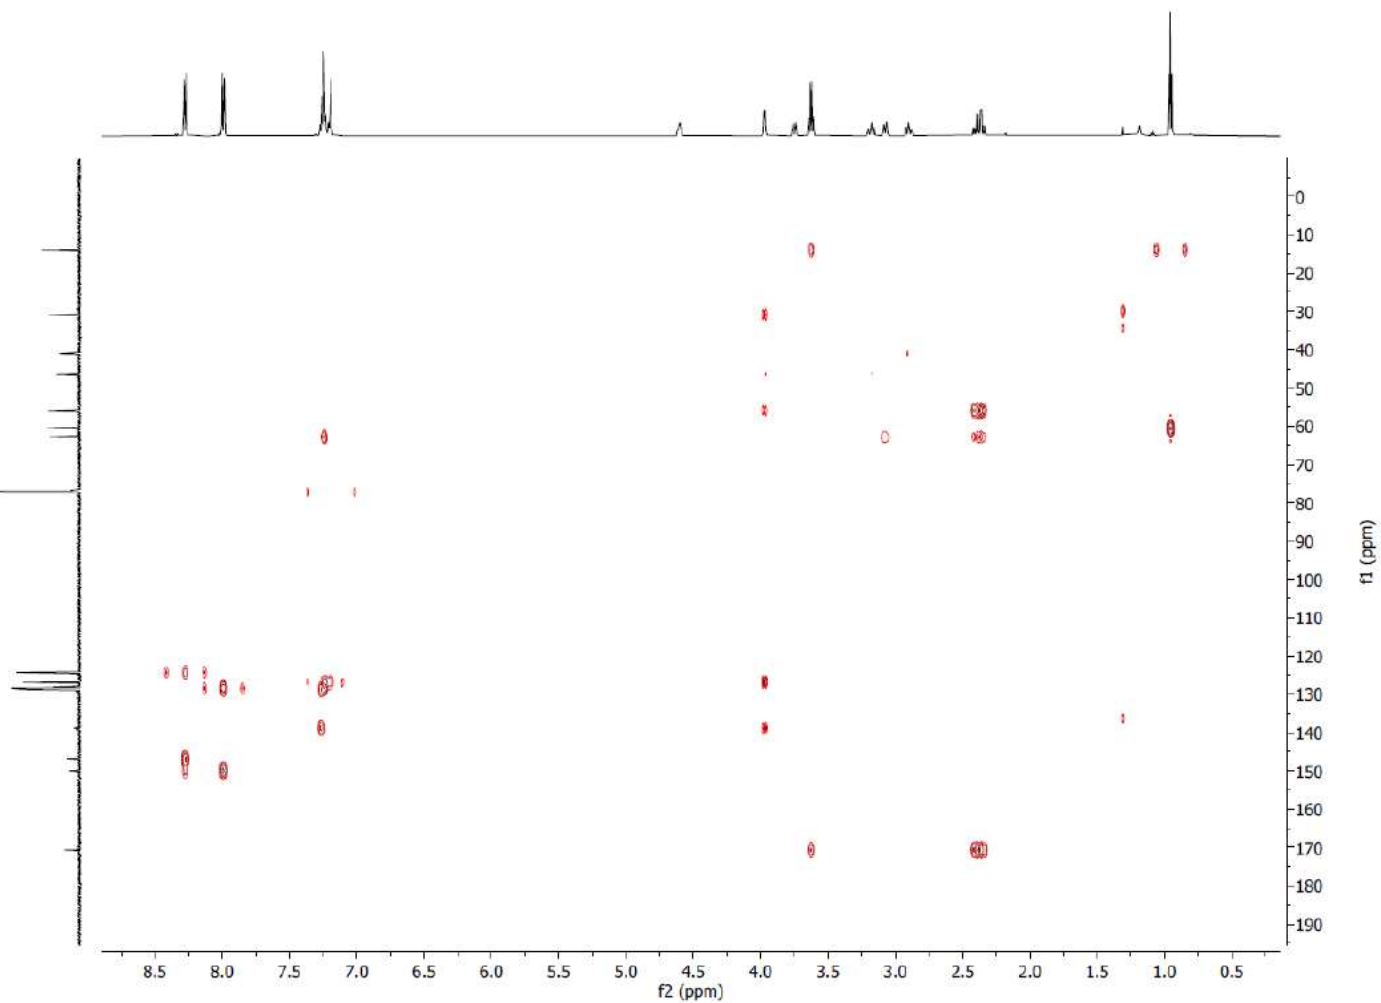

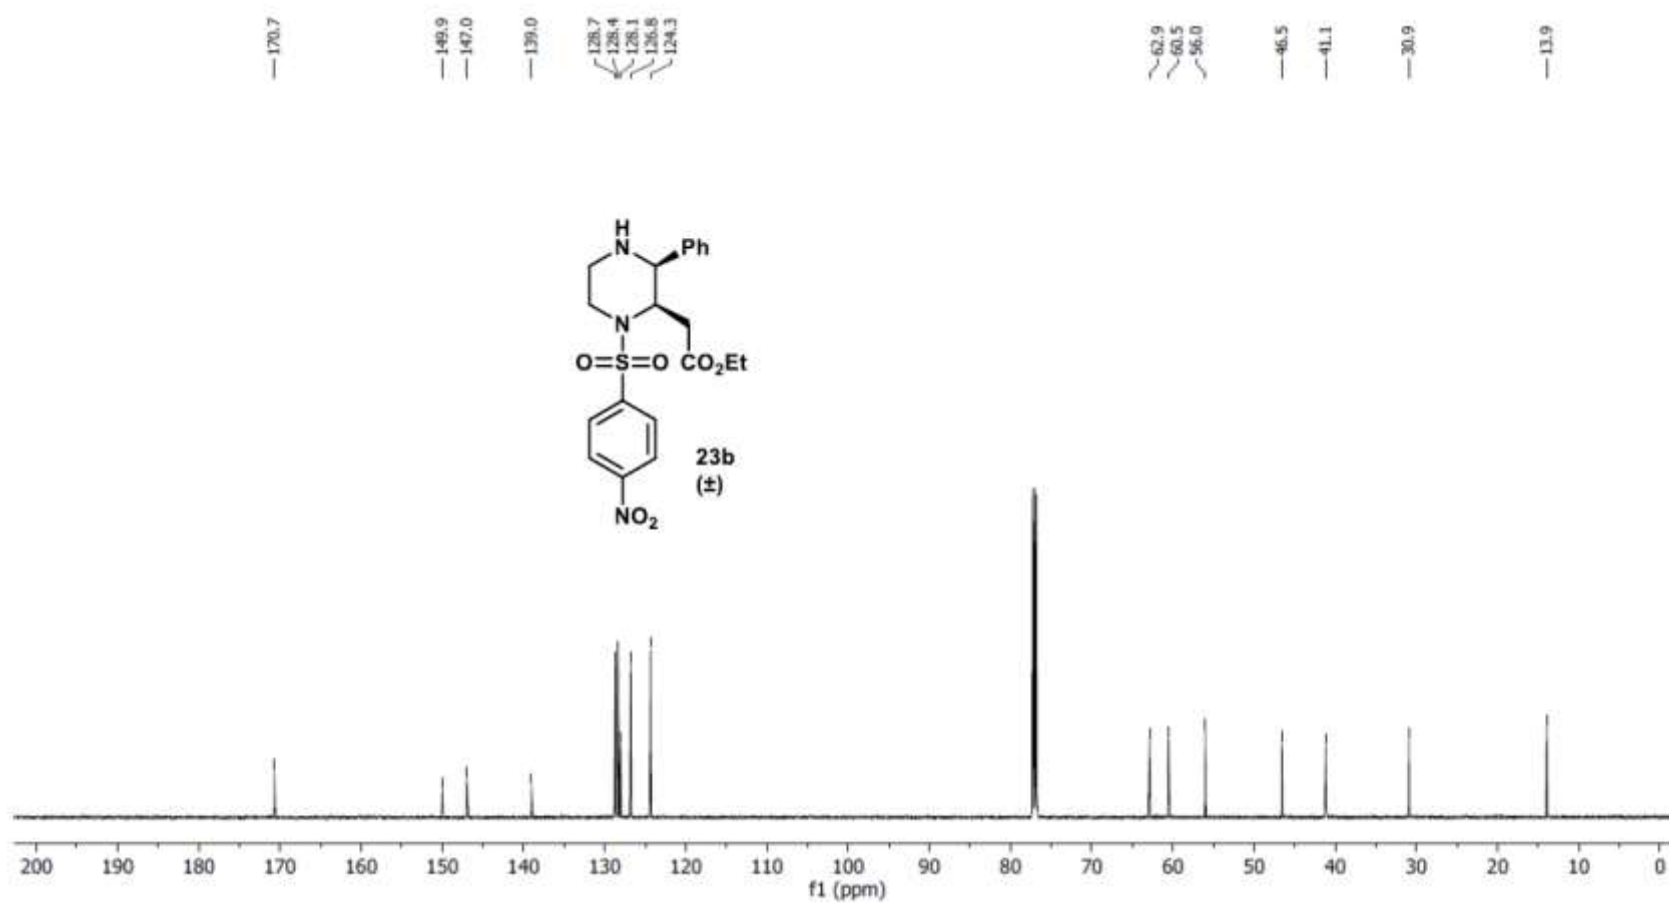

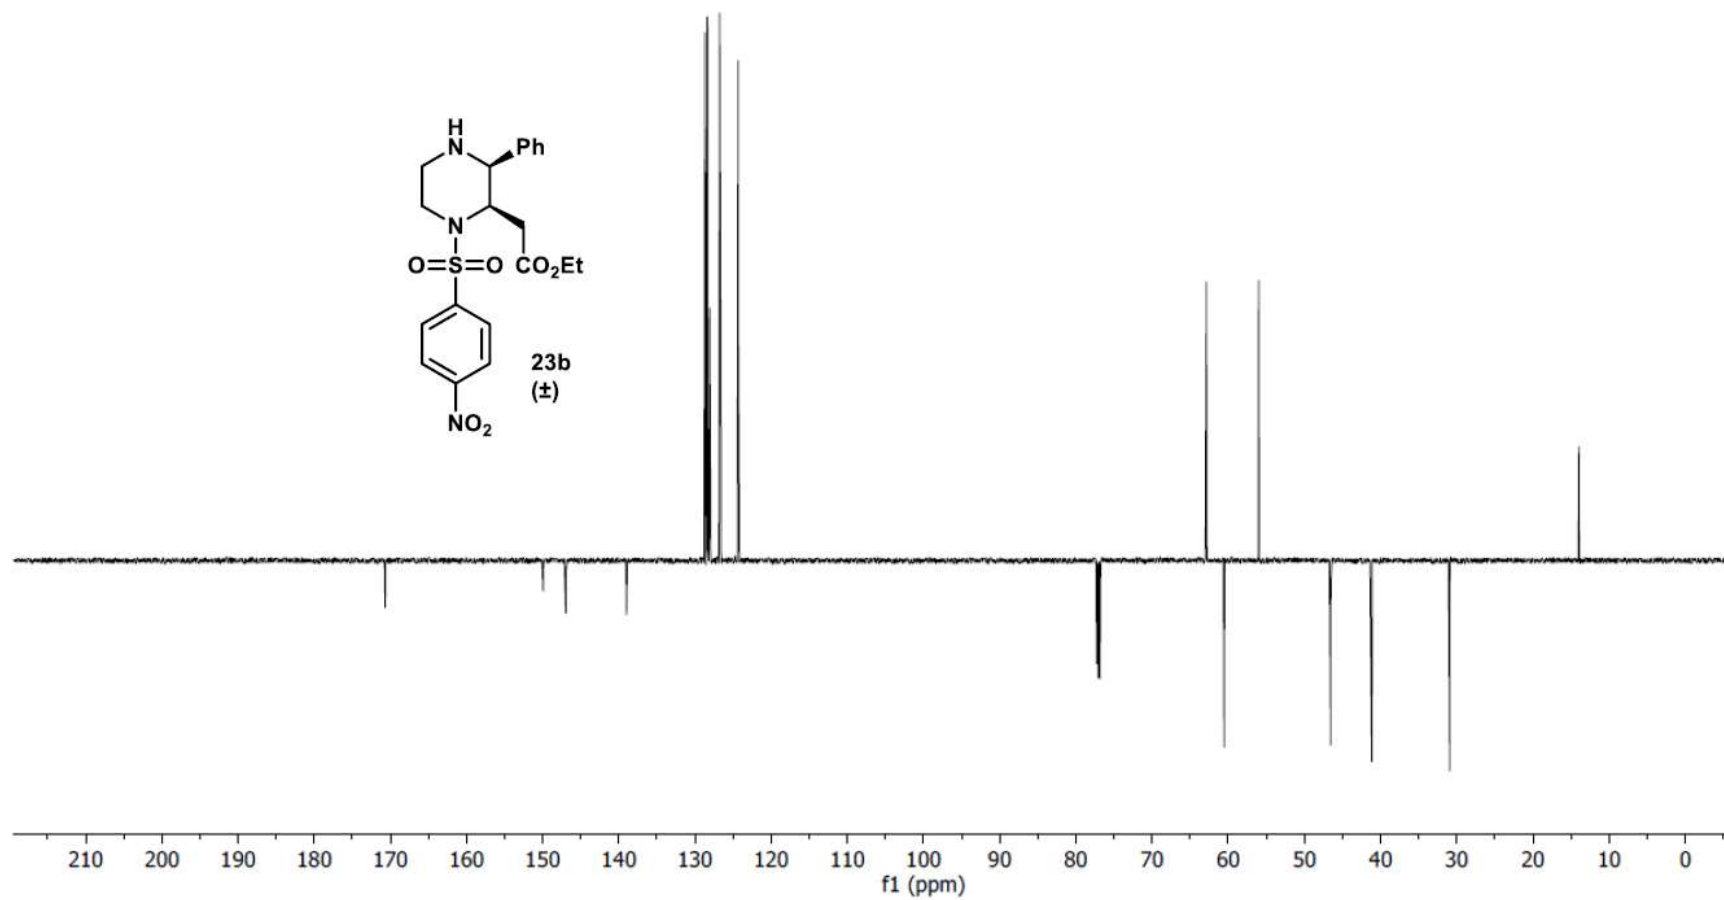

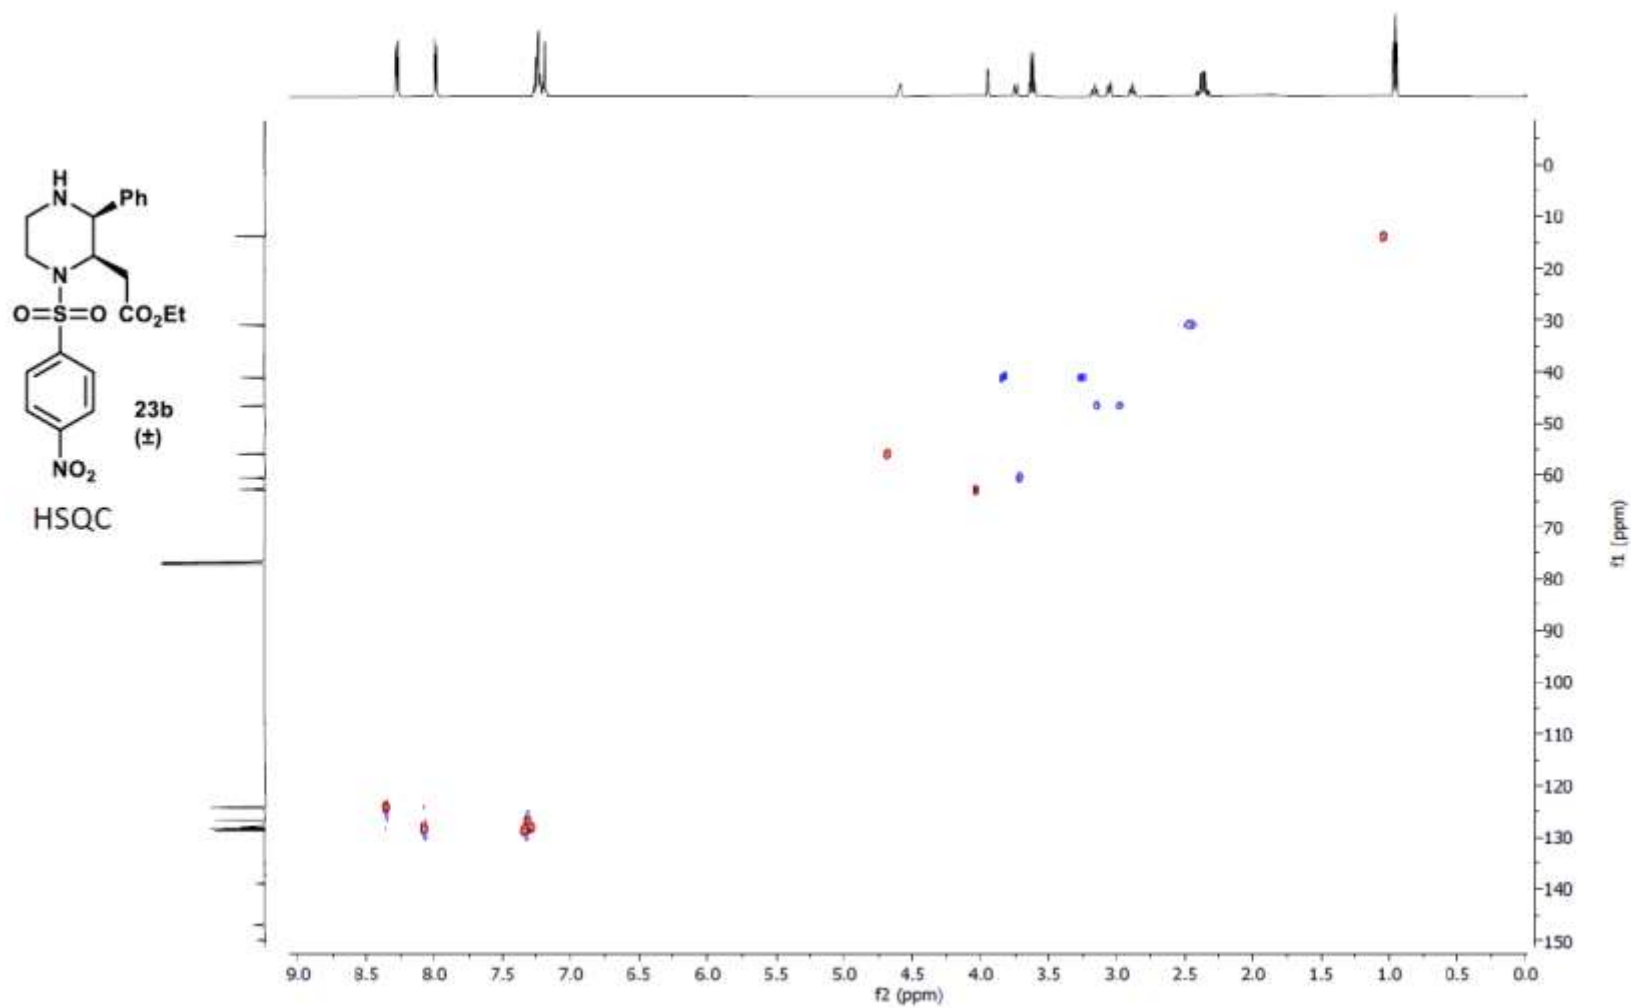

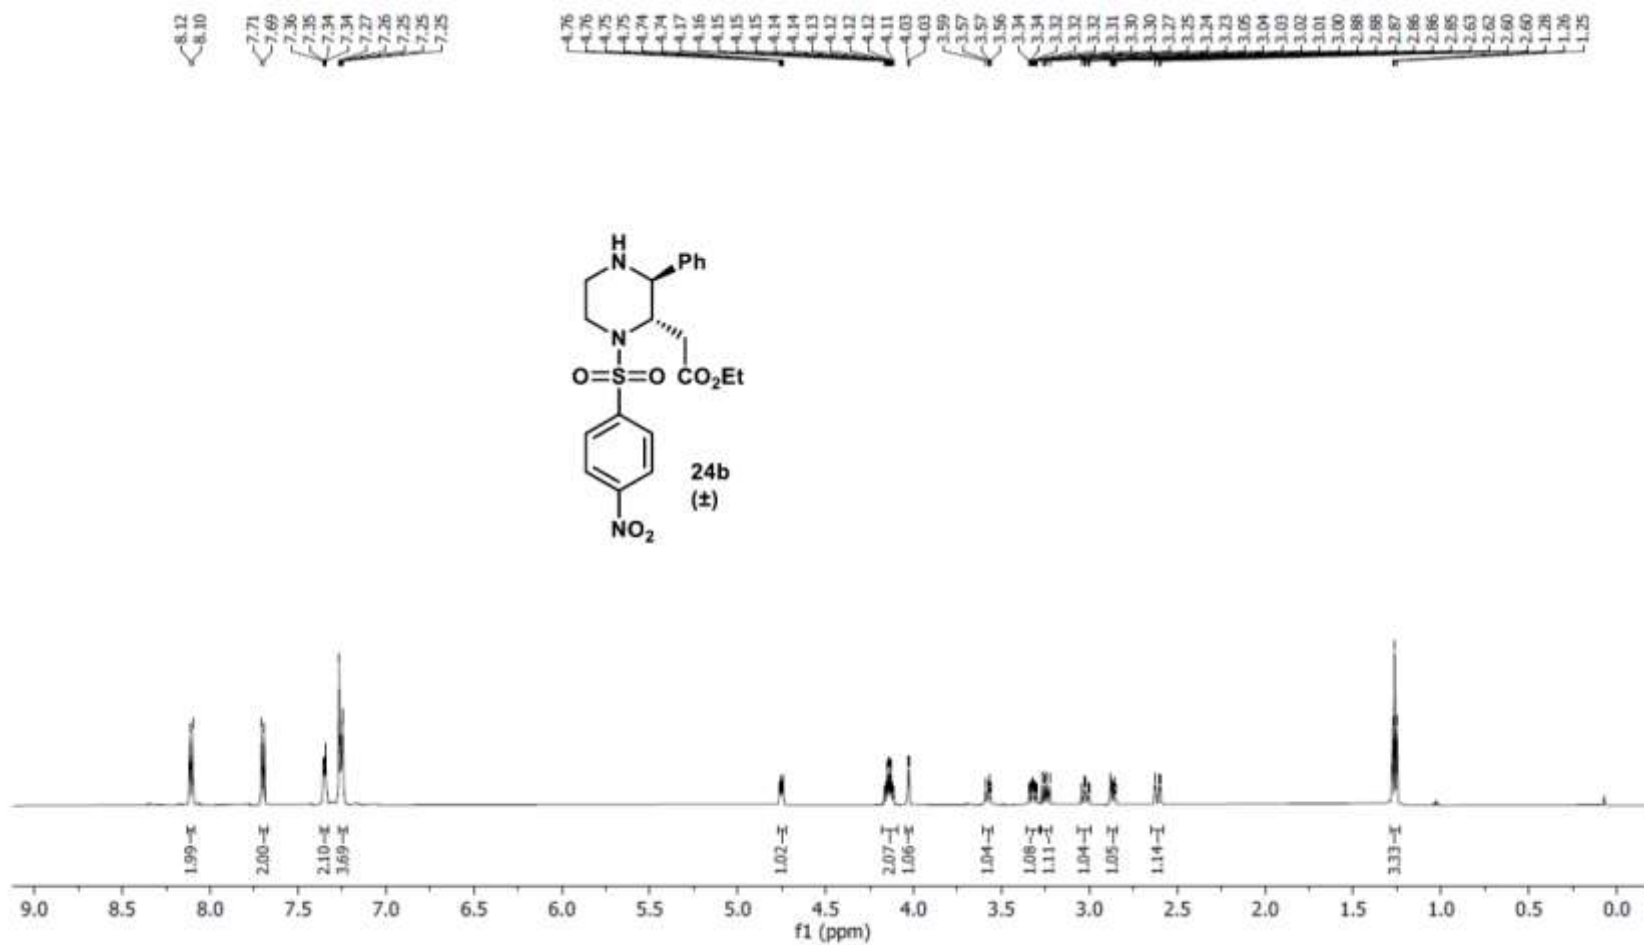

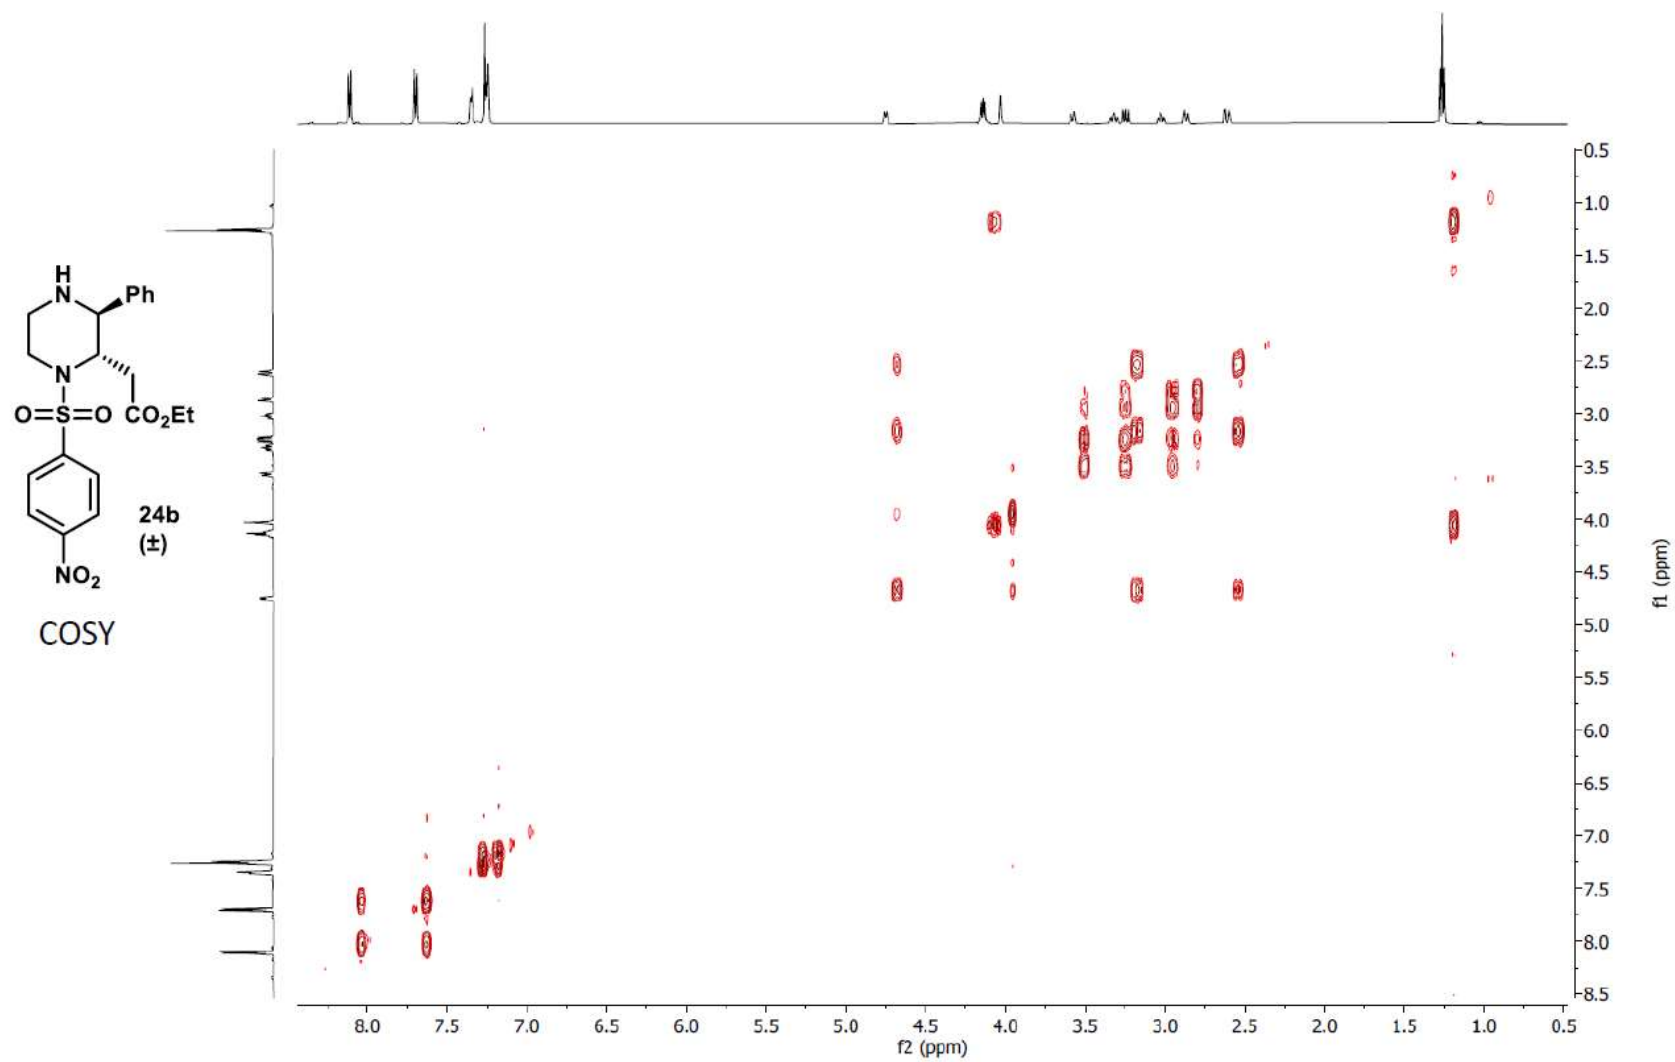

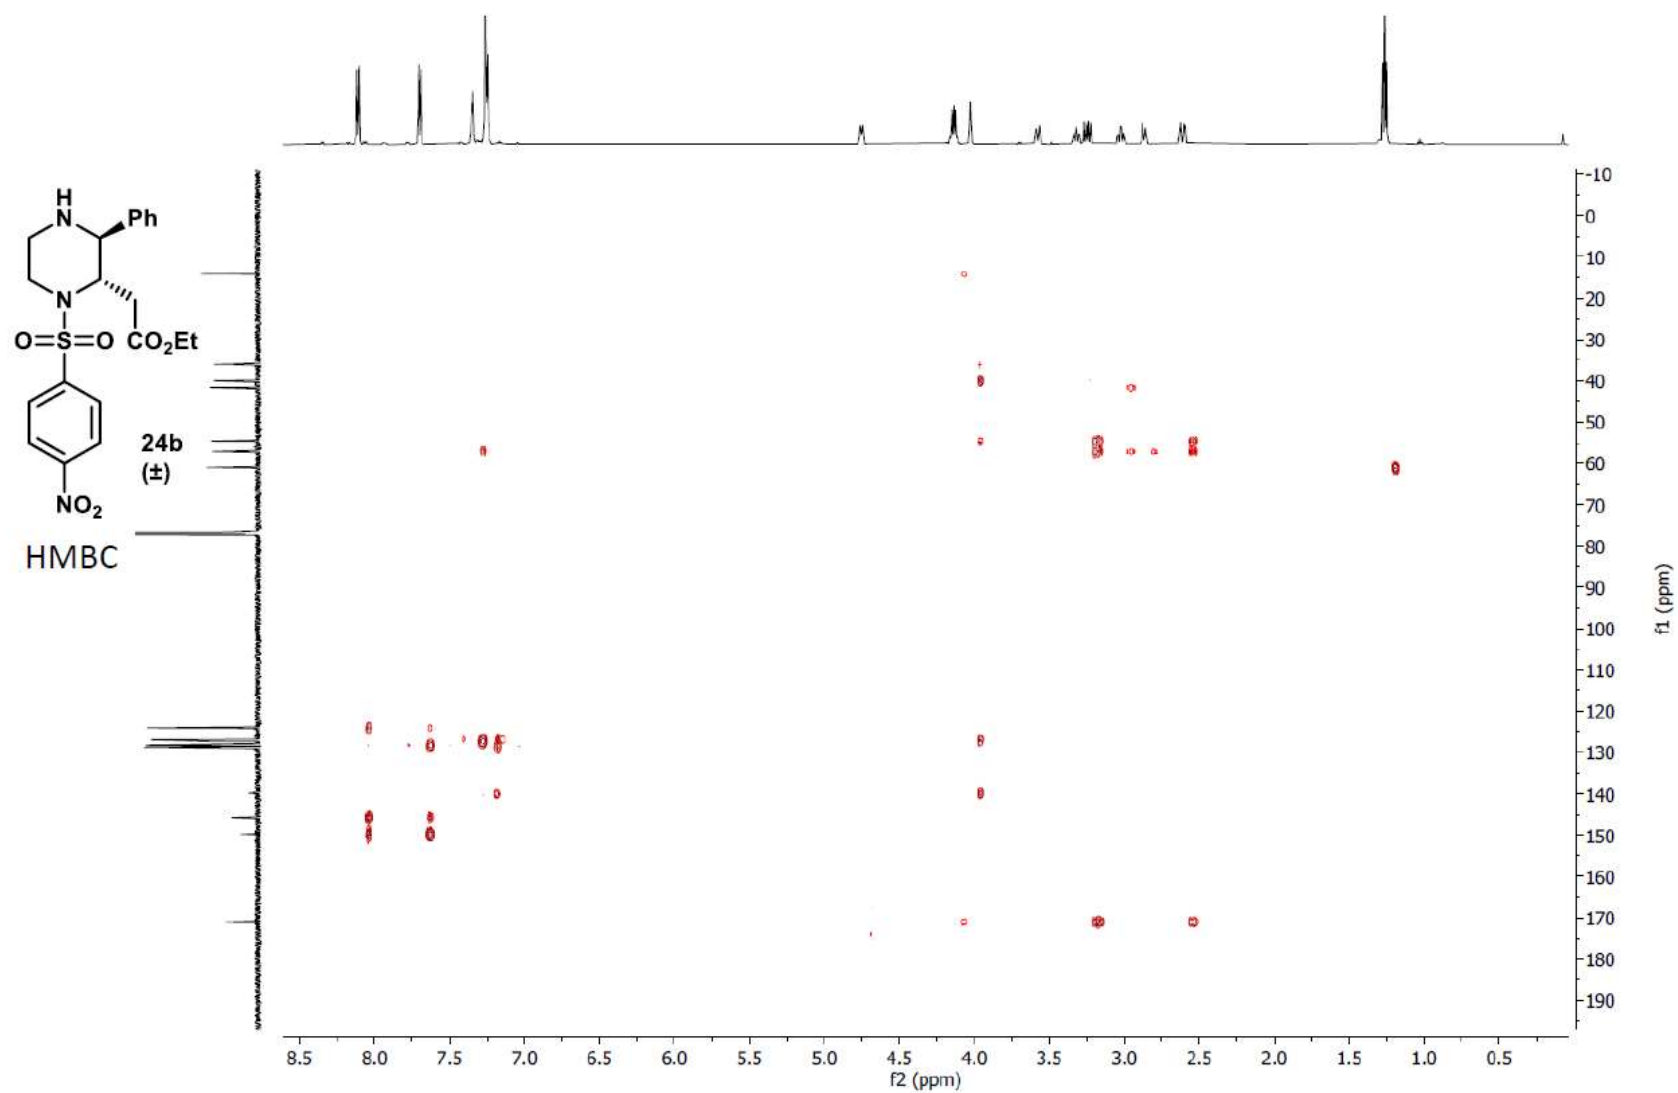

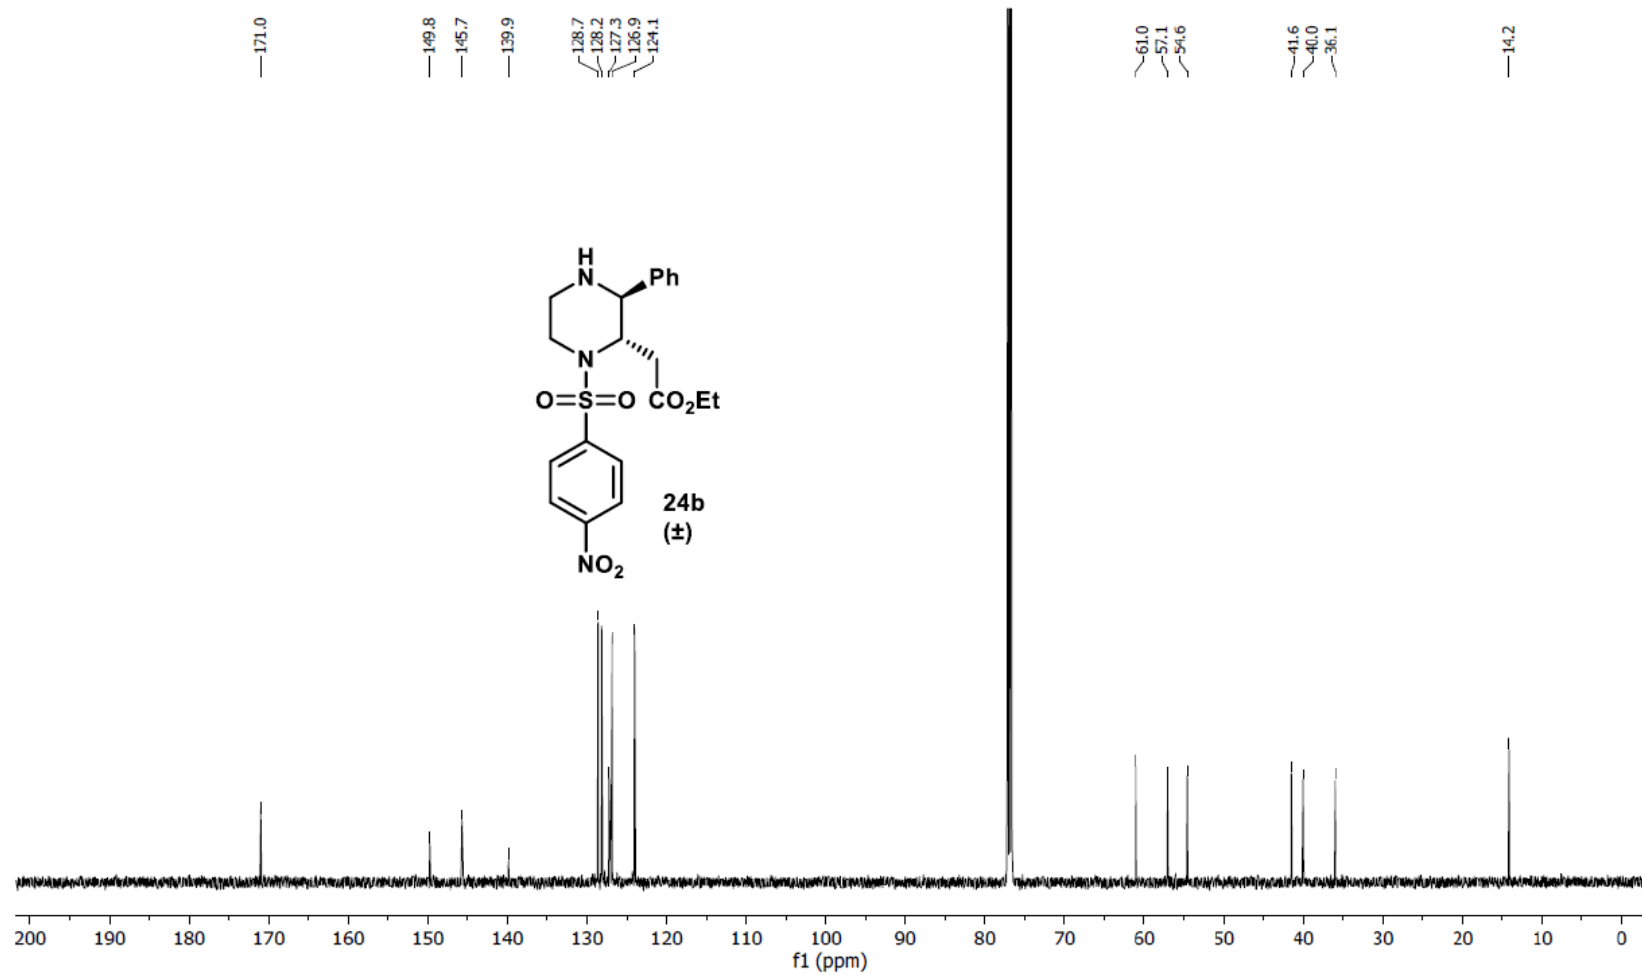

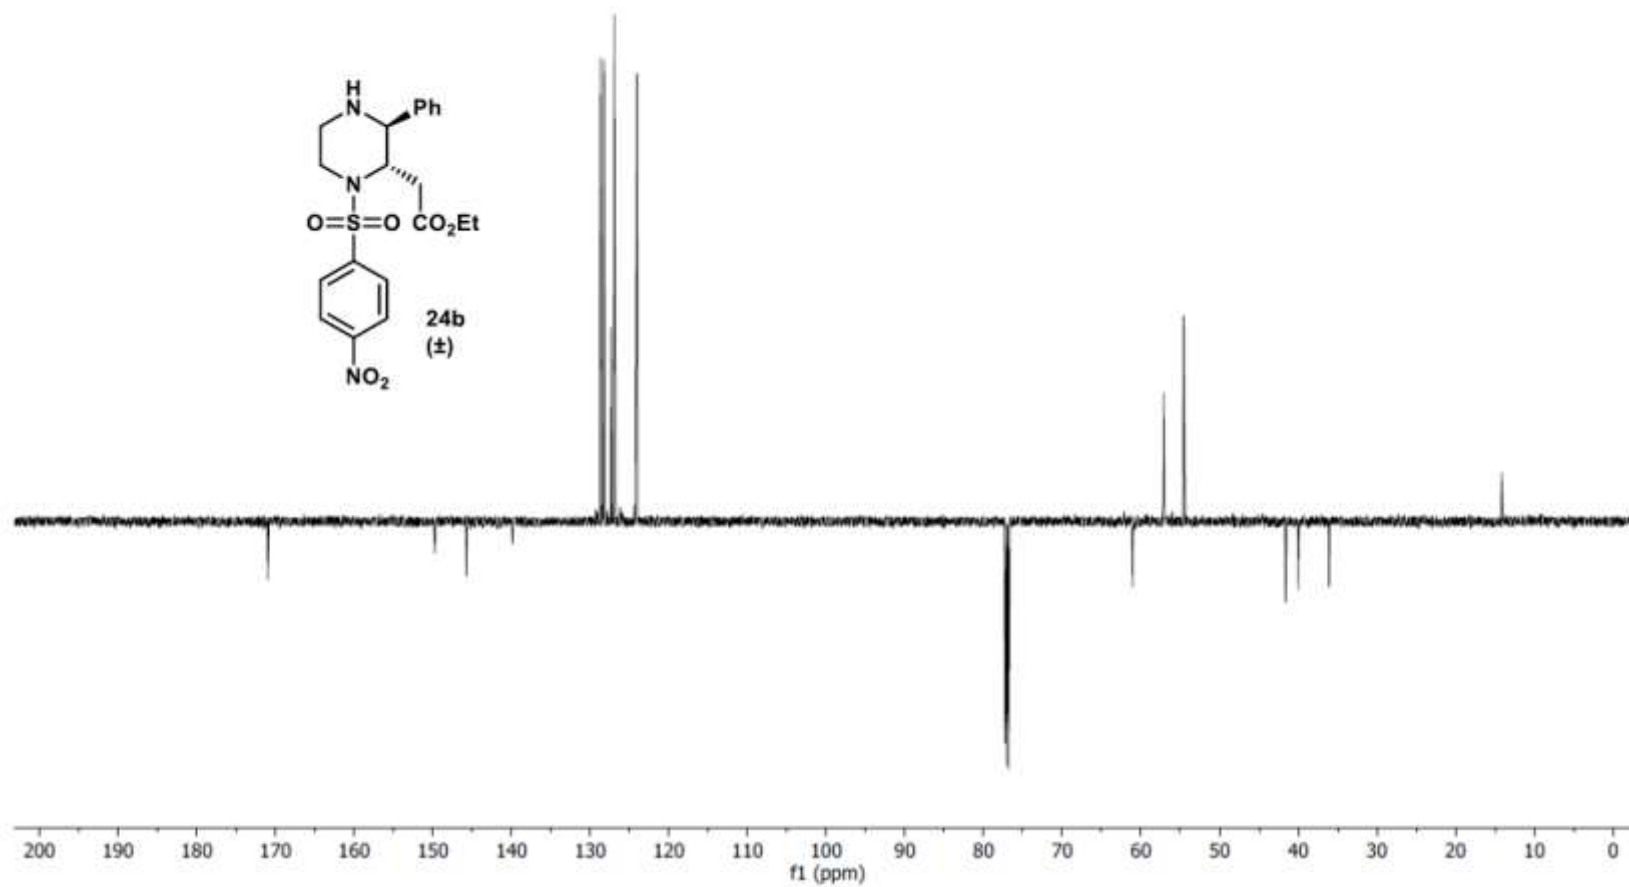

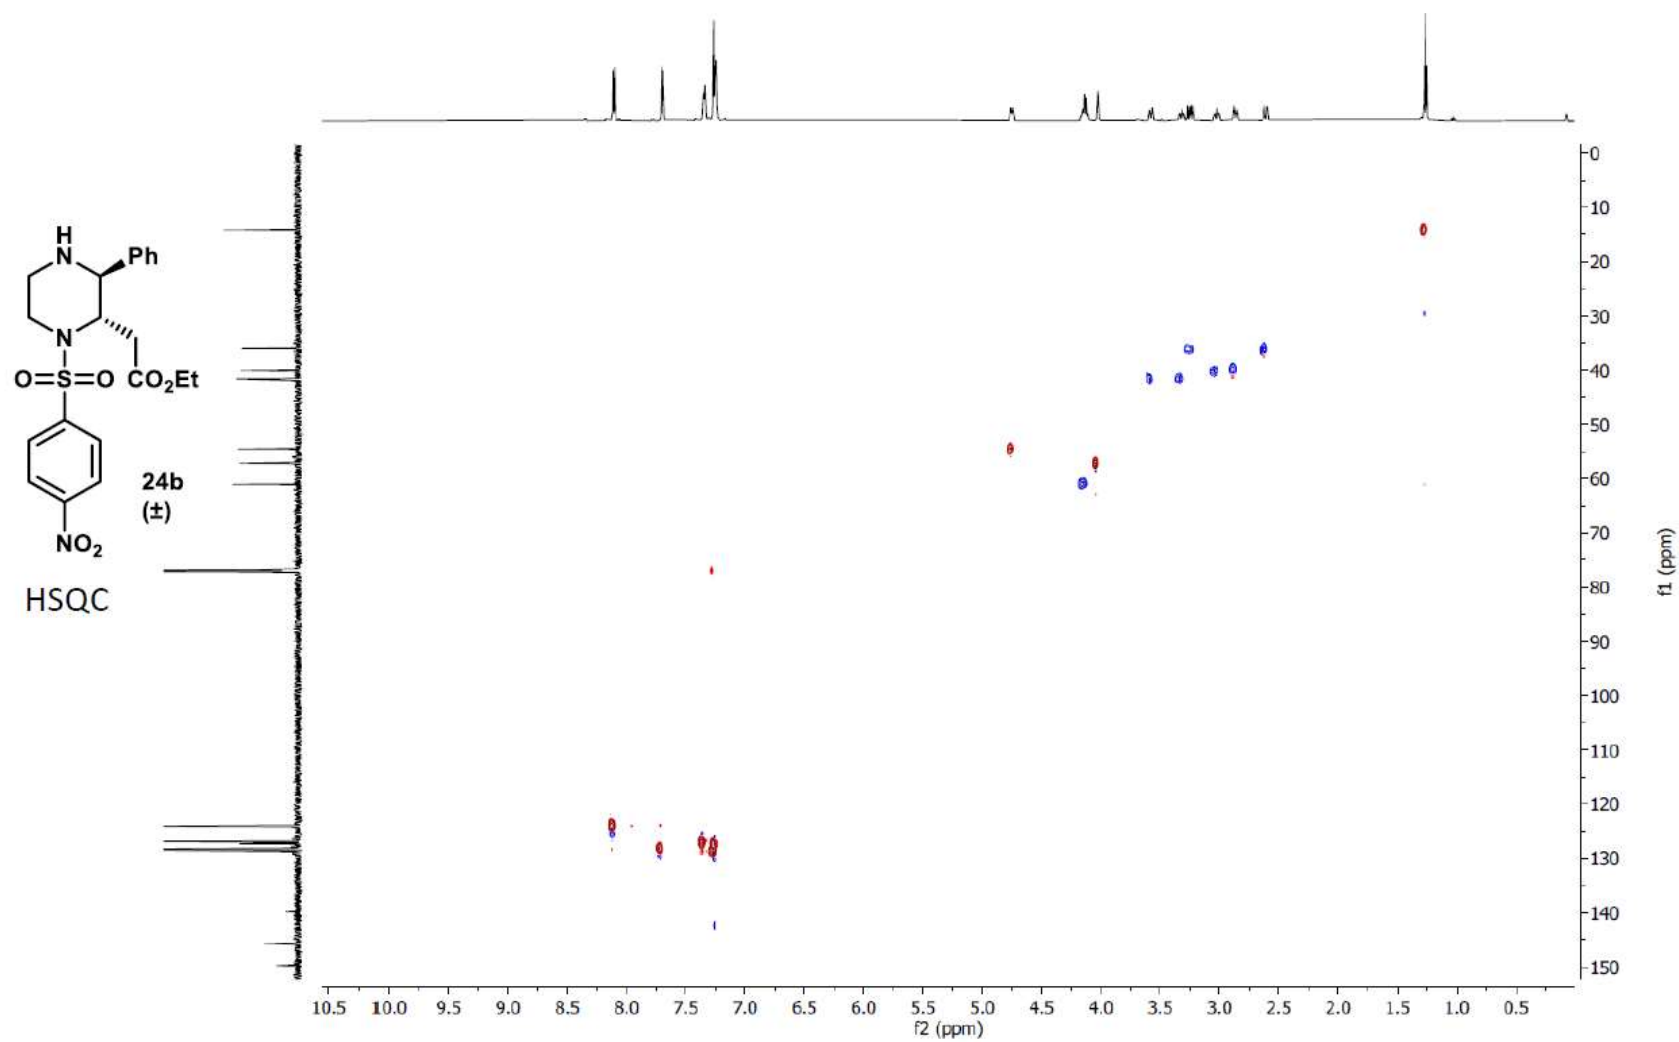

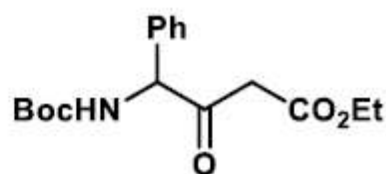

Date File C:\Chem32\1\Data\Srinivas\IT-4713 Racemic 2022-02-01 12-24-29.D  
Sample Name: IT-4713 Racemic

```

=====
Acq. Operator   : SYSTEM
Sample Operator : SYSTEM
Acq. Instrument : CHIRAL                      Location : 2
Injection Date  : 2/1/2022 12:31:15 PM
                                           Inj Volume : 5.000 µl
Acq. Method     : C:\CHEM32\1\METHODS\IA_nHep_Ethanol_Custom.M
Last changed    : 2/1/2022 12:30:24 PM by SYSTEM
Analysis Method : C:\Chem32\1\Methods\Method_develop_Chiral_IF_nHep_Ethanol.M
Last changed    : 3/18/2021 4:41:28 PM by SYSTEM
Method Info     : method development for normal phase chiral separations ChiralPak IF with n-
                   Heptane and Ethanol
  
```

Additional Info : Peak(s) manually integrated

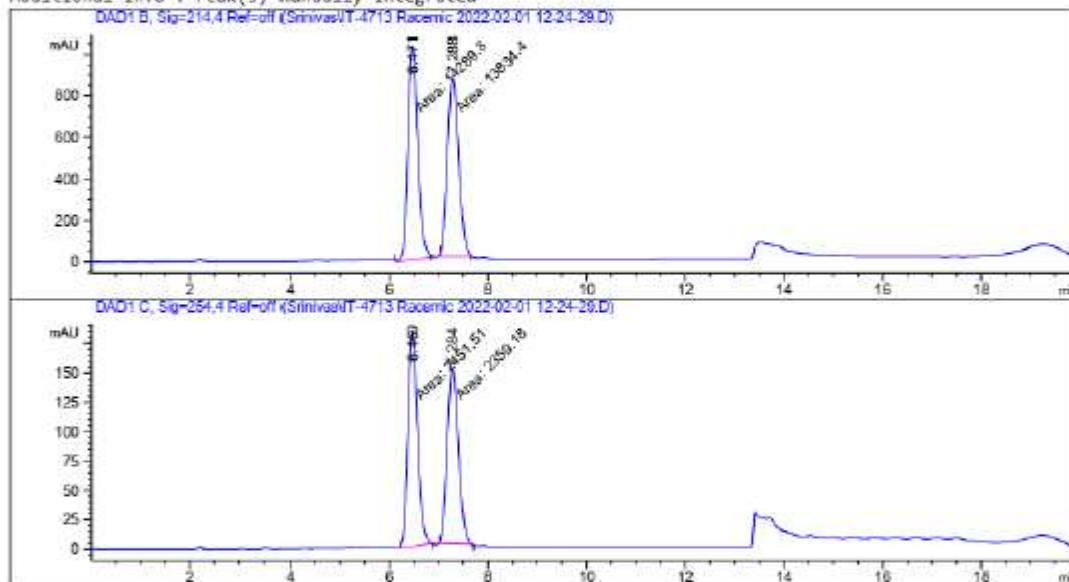

# Area Percent Report

```

=====
Sorted By      : Signal
Multiplier     : 1.0000
Dilution       : 1.0000
Sample Amount  : 1.00000 [ng/ul] (not used in calc.)
Do not use Multiplier & Dilution Factor with ISTDs
  
```

Signal 1: DAD1 B, Sig=214,4 Ref=off

| Peak # | RetTime [min] | Type | Width [min] | Area [mAU*s] | Height [mAU] | Area %  |
|--------|---------------|------|-------------|--------------|--------------|---------|
| 1      | 6.471         | PM   | 0.2324      | 1.42898e4    | 1024.70313   | 50.8096 |
| 2      | 7.288         | PM   | 0.2676      | 1.38344e4    | 861.54517    | 49.1904 |

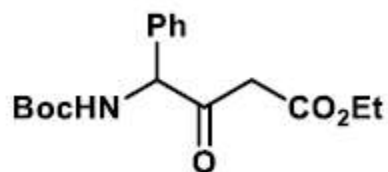

Data File C:\Chem32\1\Data\Srinivas\IT-4713 Racemic 2022-02-01 12-24-29.D  
 Sample Name: IT-4713 Racemic

Totals : 2.01242e4 1886.24829

Signal 2: DAD1 C, Sig=254,4 Ref=off

| Peak # | RetTime [min] | Type | Width [min] | Area [mAU*s] | Height [mAU] | Area %  |
|--------|---------------|------|-------------|--------------|--------------|---------|
| 1      | 6.469         | MM   | 0.2270      | 2451.50684   | 180.02174    | 50.9596 |
| 2      | 7.284         | MM   | 0.2650      | 2359.18286   | 148.37228    | 49.0404 |

Totals : 4810.68970 328.39403

\*\*\* End of Report \*\*\*



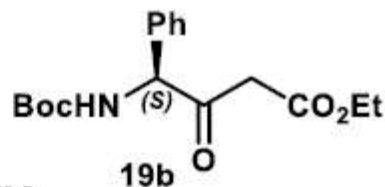

Data File C:\Chem32\1\Data\Srinivas\IT-4723 S 2022-02-01 12-24-42.D  
 Sample Name: IT-4723 S

-----  
 Acq. Operator : SYSTEM  
 Sample Operator : SYSTEM  
 Acq. Instrument : CHIRAL Location : 3  
 Injection Date : 2/1/2022 1:13:39 PM Inj Volume : 5.000 µl  
 Acq. Method : C:\CHEM32\1\METHODS\IA\_nHep\_Ethanol\_Custom.M  
 Last changed : 2/1/2022 12:30:24 PM by SYSTEM  
 Analysis Method : C:\Chem32\1\Methods\Method\_develop\_Chiral\_IF\_nHep\_Ethanol.M  
 Last changed : 3/18/2021 4:41:28 PM by SYSTEM  
 Method Info : method development for normal phase chiral separations ChiralPak IF with n-Heptane and Ethanol  
 -----

Additional Info : Peak(s) manually integrated

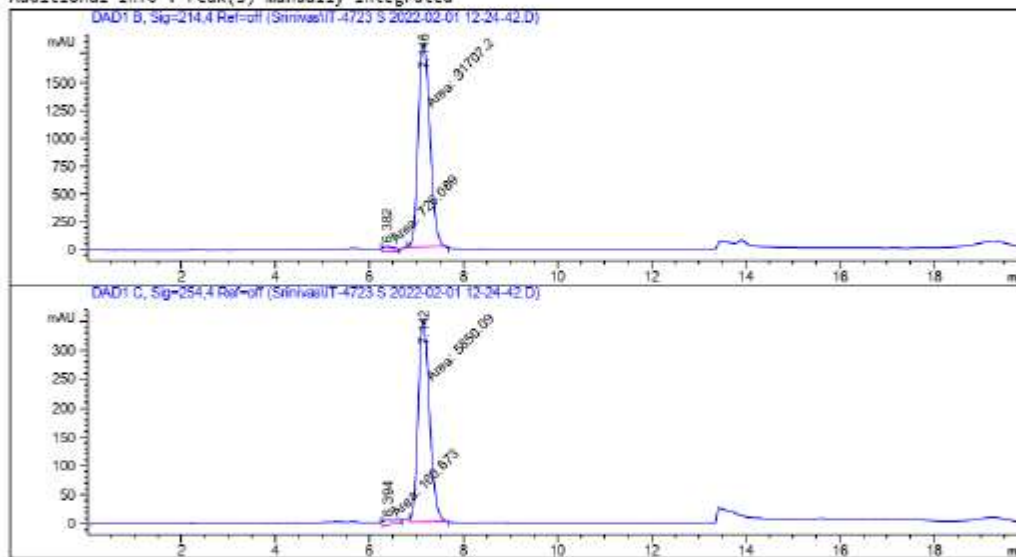

-----  
 Area Percent Report  
 -----

Sorted By : Signal  
 Multiplier : 1.0000  
 Dilution : 1.0000  
 Sample Amount: : 1.00000 [ng/ul] (not used in calc.)  
 Do not use Multiplier & Dilution Factor with ISTDs

Signal 1: DAD1 B, Sig-214,4 Ref-off

| Peak # | RetTime [min] | Type | Width [min] | Area [mAU*s] | Height [mAU] | Area %  |
|--------|---------------|------|-------------|--------------|--------------|---------|
| 1      | 6.382         | PM   | 0.2856      | 726.08911    | 42.37216     | 2.2387  |
| 2      | 7.146         | PM   | 0.2922      | 3.17072e4    | 1808.41626   | 97.7613 |

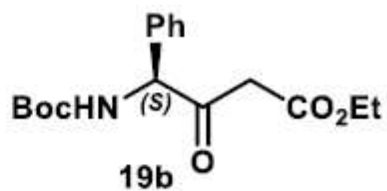

Data File C:\Chem32\1\Data\Srinivas\IT-4723 S 2022-02-01 12-24-42.D  
 Sample Name: IT-4723 S

Totals : 3.24333e4 1850.78842

Signal 2: DAD1 C, Sig=254,4 Ref=off

| Peak # | RetTime [min] | Type | Width [min] | Area [mAU*s] | Height [mAU] | Area %  |
|--------|---------------|------|-------------|--------------|--------------|---------|
| 1      | 6.394         | MM   | 0.3181      | 160.67343    | 8.41785      | 2.6731  |
| 2      | 7.142         | MM   | 0.2792      | 5850.09180   | 349.22180    | 97.3269 |

Totals : 6010.76523 357.63965

\*\*\* End of Report \*\*\*



Data File C:\Chem32\1\Data\Srinivas\IT-4747 R 2022-02-01 12-30-33.D  
Sample Name: IT-4747 R

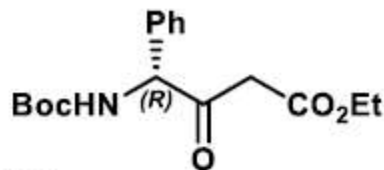

-----  
Acq. Operator : SYSTEM  
Sample Operator : SYSTEM  
Acq. Instrument : CHIRAL Location : 4  
Injection Date : 2/1/2022 1:56:02 PM  
Inj Volume : 5.000 µl  
Acq. Method : C:\CHEM32\1\METHODS\IA\_nHep\_Ethanol\_Custom.M  
Last changed : 2/1/2022 12:30:24 PM by SYSTEM  
Analysis Method : C:\Chem32\1\METHODS\Method\_develop\_Chiral\_IF\_nHep\_Ethanol.M  
Last changed : 3/18/2021 4:41:28 PM by SYSTEM  
Method Info : method development for normal phase chiral separations ChiralPak IF with n-Heptane and Ethanol  
-----

Additional Info : Peak(s) manually integrated

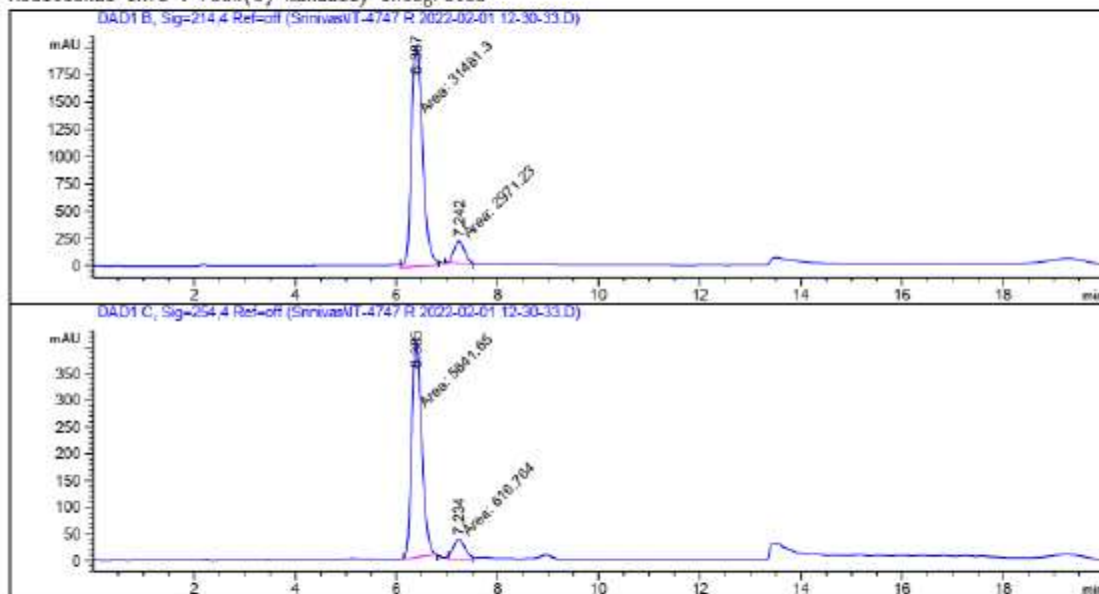

-----  
Area Percent Report  
-----

Sorted By : Signal  
Multiplier : 1.0000  
Dilution : 1.0000  
Sample Amount : 1.00000 [ng/ul] (not used in calc.)  
Do not use Multiplier & Dilution Factor with ISTDs

Signal 1: DAD1 B, Sig=214.4 Ref-off

| Peak # | RetTime [min] | Type | Width [min] | Area [mAU*s] | Height [mAU] | Area %  |
|--------|---------------|------|-------------|--------------|--------------|---------|
| 1      | 6.387         | PM   | 0.2606      | 3.14813e4    | 2013.11328   | 91.3759 |
| 2      | 7.242         | PM   | 0.2471      | 2971.23193   | 200.36804    | 8.6241  |

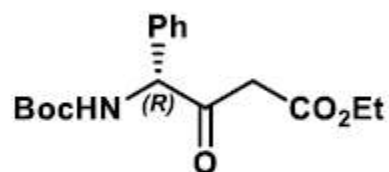

Data File C:\Chem32\1\Data\Srinivas\IT-4747 R 2022-02-01 12-30-33.0  
Sample Name: IT-4747 R

Totals : 3.44526e4 2213.48132

Signal 2: DAD1 C, Sig=254,4 Ref=off

| Peak # | RetTime [min] | Type | Width [min] | Area [mAU*s] | Height [mAU] | Area %  |
|--------|---------------|------|-------------|--------------|--------------|---------|
| 1      | 6.385         | MM   | 0.2315      | 5641.65381   | 406.22049    | 90.1451 |
| 2      | 7.234         | MM   | 0.2674      | 616.76367    | 38.43676     | 9.8549  |

Totals : 6258.41748 444.65725

\*\*\* End of Report \*\*\*

Data File C:\Chem32\1\Data\Srinivas\4796 Upper and Lower 2022-05-12 14:51:01\002-0201.D  
Sample Name: Upper Racemic

```
=====
Acq. Operator   : SYSTEM                      Seq. Line :    2
Acq. Instrument : CHIRAL                     Location  :    2
Injection Date  : 5/12/2022 3:09:11 PM        Inj       :    1
                                           Inj Volume: 10.000 µl
Method          : C:\Chem32\1\Data\Srinivas\4796 Upper and Lower 2022-05-12 14:51:01\FAST_
                  Chiral_Scout_IF_nHep_Ethanol.M (Sequence Method)
Last changed    : 5/12/2022 2:51:01 PM by SYSTEM
Method Info     : Scouting method for normal phase chiral separations ChiralPak IF with n-
                  Heptane and Ethanol
=====
```

Additional Info : Peak(s) manually integrated

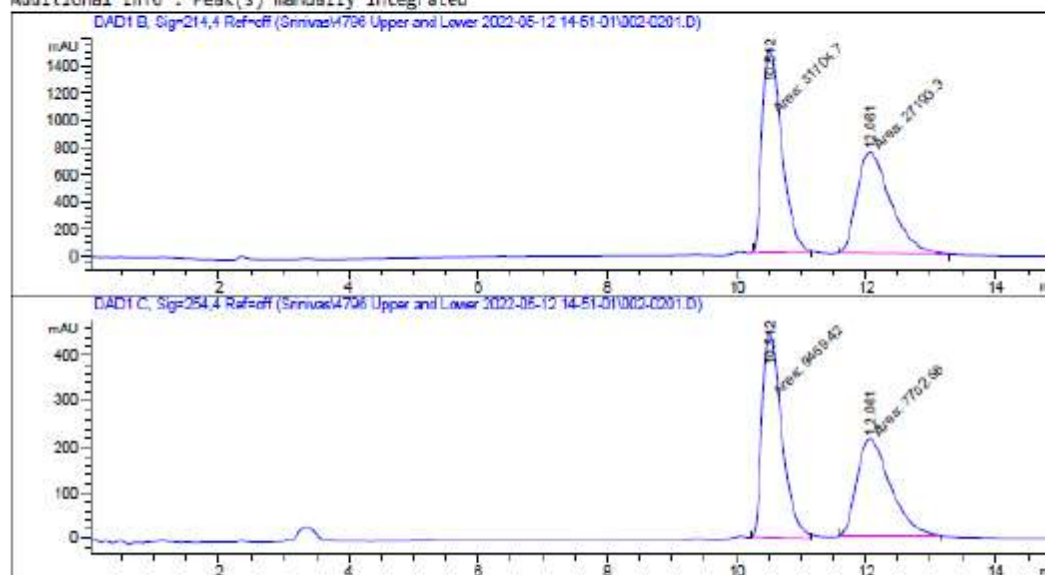

# Area Percent Report

```
=====
Sorted By      : Signal
Multiplier     : 1.0000
Dilution       : 1.0000
Do not use Multiplier & Dilution Factor with ISTDs
=====
```

Signal 1: DAD1 B, Sig=214,4 Ref=off

| Peak # | RetTime [min] | Type | Width [min] | Area [mAU*s] | Height [mAU] | Area %  |
|--------|---------------|------|-------------|--------------|--------------|---------|
| 1      | 10.512        | MM   | 0.3518      | 3.17847e4    | 1501.98840   | 53.8298 |
| 2      | 12.061        | MM   | 0.6105      | 2.71933e4    | 742.32043    | 46.1702 |

Totals : 5.88980e4 2244.30684

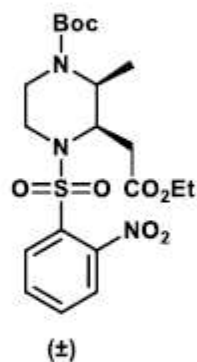

Data File C:\Chem32\1\Data\Srinivas\4796 Upper and Lower 2022-05-12 14-51-01\002-0201.D  
 Sample Name: Upper Racemic

Signal 2: DAD1 C, Sig=254,4 Ref=off

| Peak # | RetTime [min] | Type | Width [min] | Area [nAU*s] | Height [nAU] | Area %  |
|--------|---------------|------|-------------|--------------|--------------|---------|
| 1      | 10.512        | MM   | 0.3495      | 9469.42383   | 451.55734    | 55.1446 |
| 2      | 12.061        | MM   | 0.6012      | 7702.55957   | 213.53856    | 44.8554 |

Totals : 1.71728e4 665.09590

\*\*\* End of Report \*\*\*

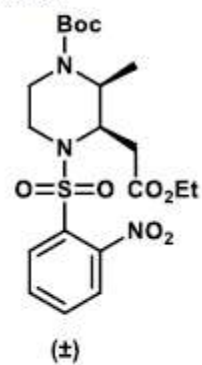



Data File C:\Chem32\1\Data\Srinivas\4796 Upper and Lower 2022-05-12 14-51-01\003-0301.D  
Sample Name: 4796 Upper

```
=====
Acq. Operator   : SYSTEM                      Seq. Line :    3
Acq. Instrument : CHIRAL                      Location  :    3
Injection Date  : 5/12/2022 3:25:22 PM        Inj       :    1
                                           Inj Volume: 10.000 µl
Method          : C:\Chem32\1\Data\Srinivas\4796 Upper and Lower 2022-05-12 14-51-01\FAST_
                  Chiral_Scout_IF_nHep_Ethanol.M (Sequence Method)
Last changed    : 5/12/2022 2:51:01 PM by SYSTEM
Method Info     : Scouting method for normal phase chiral separations ChiralPak IF with n-
                  Heptane and Ethanol
=====
```

Additional Info : Peak(s) manually integrated

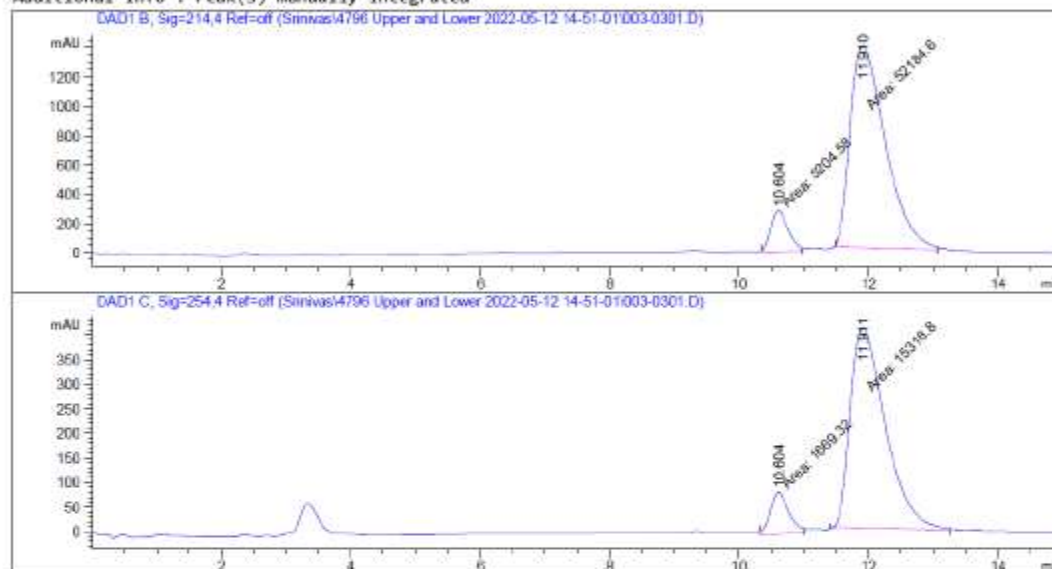

# Area Percent Report

```
=====
Sorted By      : Signal
Multiplier     : 1.0000
Dilution       : 1.0000
Do not use Multiplier & Dilution Factor with ISTDs
=====
```

Signal 1: DAD1 B, Sig=214,4 Ref=off

| Peak # | RetTime [min] | Type | Width [min] | Area [mAU*s] | Height [mAU] | Area %  |
|--------|---------------|------|-------------|--------------|--------------|---------|
| 1      | 10.604        | MM   | 0.3087      | 5204.57568   | 280.98712    | 9.0689  |
| 2      | 11.910        | MM   | 0.6312      | 5.21846e4    | 1377.94214   | 90.9311 |

Totals : 5.73891e4 1658.92926

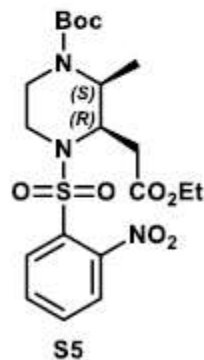

Data File C:\Chem32\1\Data\Srinivas\4796 Upper and Lower 2022-05-12 14-51-01\003-0301.D  
Sample Name: 4796 Upper

Signal 2: DAD1 C, Sig=254,4 Ref=off

| Peak #   | RetTime [min] | Type | Width [min] | Area [mAU*s] | Height [mAU] | Area %  |
|----------|---------------|------|-------------|--------------|--------------|---------|
| 1        | 10.604        | MM   | 0.3263      | 1669.32361   | 85.27359     | 9.8264  |
| 2        | 11.911        | MM   | 0.6264      | 1.53188e4    | 407.59848    | 90.1736 |
| Totals : |               |      |             | 1.69881e4    | 492.87207    |         |

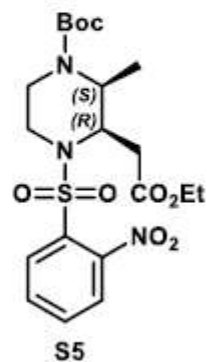

\*\*\* End of Report \*\*\*

Data File C:\Chem32\1\Data\Srinivas\4796 Upper and Lower 2022-05-12 14-51-01\004-0501.D  
Sample Name: Lower Racemic

```
=====
Acq. Operator   : SYSTEM                      Seq. Line :    5
Acq. Instrument : CHIRAL                      Location  :    4
Injection Date  : 5/12/2022 3:57:49 PM        Inj       :    1
                                           Inj Volume: 10.000 µl
Method          : C:\Chem32\1\Data\Srinivas\4796 Upper and Lower 2022-05-12 14-51-01\FAST_
                  Chiral_Scout_IF_nHep_Ethanol.M (Sequence Method)
Last changed    : 5/12/2022 2:51:01 PM by SYSTEM
Method Info     : Scouting method for normal phase chiral separations ChiralPak IF with n-
                  Heptane and Ethanol
=====
```

Additional Info : Peak(s) manually integrated

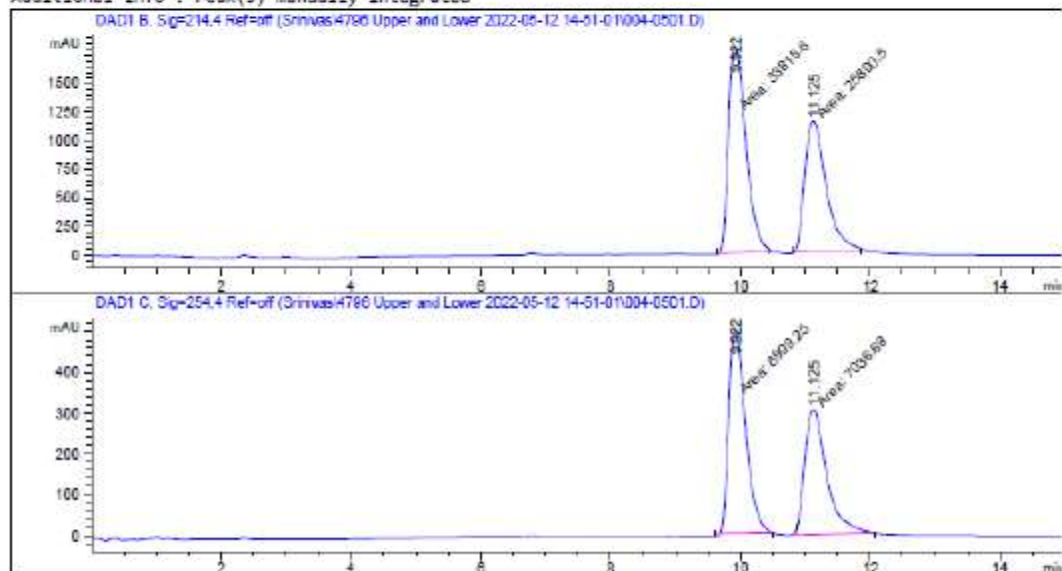

# Area Percent Report

```
=====
Sorted By      :      Signal
Multiplier     :      1.0000
Dilution       :      1.0000
Do not use Multiplier & Dilution Factor with ISTDs
=====
```

Signal 1: DAD1 B, Sig=214.4 Ref=off

| Peak # | RetTime [min] | Type | Width [min] | Area [mAU*s] | Height [mAU] | Area %  |
|--------|---------------|------|-------------|--------------|--------------|---------|
| 1      | 9.922         | MM   | 0.3119      | 3.38156e4    | 1806.72754   | 56.7222 |
| 2      | 11.125        | MM   | 0.3794      | 2.58005e4    | 1133.49927   | 43.2778 |

Totals : 5.96161e4 2940.22681

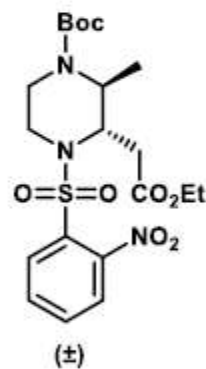

Data File C:\Chem32\1\Data\Srinivas\4796 Upper and Lower 2022-05-12 14-51-01\004-0501.D  
Sample Name: Lower Racemic

Signal 2: DAD1 C, Sig=254,4 Ref=off

| Peak # | RetTime [min] | Type | Width [min] | Area [mAU*s] | Height [mAU] | Area %  |
|--------|---------------|------|-------------|--------------|--------------|---------|
| 1      | 9.922         | MM   | 0.3000      | 8999.25293   | 499.96991    | 56.1193 |
| 2      | 11.125        | MM   | 0.3837      | 7036.67822   | 305.66632    | 43.8807 |

Totals : 1.60359e4 805.63623

\*\*\* End of Report \*\*\*

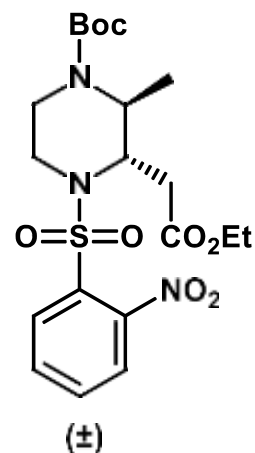



Data File C:\Chem32\1\Data\Srinivas\4796 Upper and Lower 2022-05-12 14-51-01\005-0601.D  
Sample Name: 4796 Lower

```

=====
Acq. Operator   : SYSTEM                      Seq. Line :    5
Acq. Instrument : CHIRAL                     Location  :    5
Injection Date  : 5/12/2022 4:14:00 PM        Inj       :    1
                                           Inj Volume: 10.000 µl
Method         : C:\Chem32\1\Data\Srinivas\4796 Upper and Lower 2022-05-12 14-51-01\FAST_
                  Chiral_Scout_IF_nHept_Ethanol.M (Sequence Method)
Last changed    : 5/12/2022 2:51:01 PM by SYSTEM
Method Info     : Scouting method for normal phase chiral separations ChiralPak IF with n-
                  Heptane and Ethanol
=====

```

Additional Info : Peak(s) manually integrated

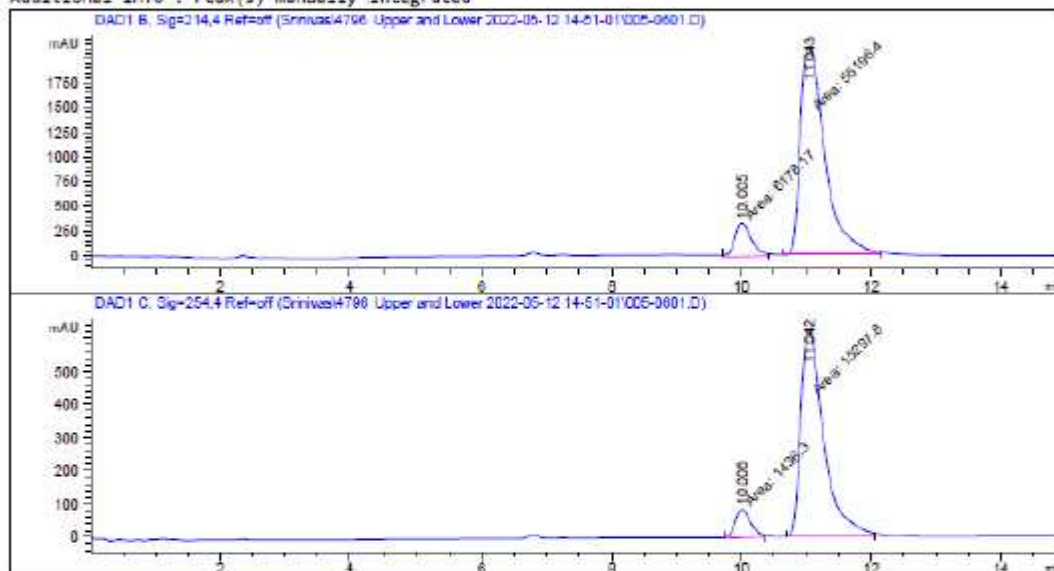

# Area Percent Report

```

=====
Sorted By      : Signal
Multiplier     : 1.0000
Dilution       : 1.0000
Do not use Multiplier & Dilution Factor with ISTDs
=====

```

Signal 1: DAD1 B, Sig=214,4 Ref=off

| Peak # | RetTime [min] | Type | Width [min] | Area [mAU*s] | Height [mAU] | Area %  |
|--------|---------------|------|-------------|--------------|--------------|---------|
| 1      | 10.005        | MM   | 0.3009      | 6178.16748   | 342.18903    | 10.0663 |
| 2      | 11.043        | MM   | 0.4382      | 5.51964e4    | 2899.14819   | 89.9337 |

Totals : 6.13746e4 2441.33722

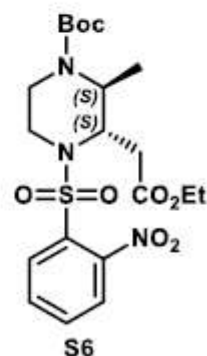

Data File C:\Chem32\1\Data\Srinivas\4796 Upper and Lower 2022-05-12 14-51-01\005-0601.D  
 Sample Name: 4796 Lower

Signal 2: DAD1 C, Sig=254,4 Ref=off

| Peak # | RetTime [min] | Type | Width [min] | Area [nAU*s] | Height [nAU] | Area %  |
|--------|---------------|------|-------------|--------------|--------------|---------|
| 1      | 10.006        | MM   | 0.2793      | 1436.29565   | 85.71114     | 8.5830  |
| 2      | 11.042        | MM   | 0.4102      | 1.52978e4    | 621.56360    | 91.4170 |

Totals : 1.67341e4 707.27473

\*\*\* End of Report \*\*\*

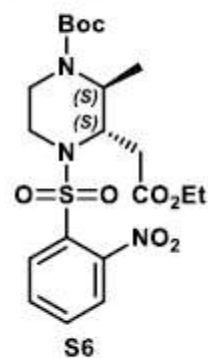

Supplement: s1 [file s1]
